# Supplementary material for: Machine Learning Prediction Models to Evaluate the Strength of Recycled Aggregate Concrete
Source: MDPI journal article supplement (doi:10.3390/ma15082823), 2022-04-12
Supplement: s1 [file s1]

## Article

# Machine Learning Prediction Models to Evaluate the Strength of Recycled Aggregate Concrete

Xiongzhou Yuan <sup>1</sup>, Yuze Tian <sup>2,\*</sup>, Waqas Ahmad <sup>3,\*</sup>, Ayaz Ahmad <sup>3,4</sup>, Kseniia Iurevna Usanova <sup>5</sup>, Abdeliazim Mustafa Mohamed <sup>6,7</sup> and Rana Khallaf <sup>8</sup>

<sup>1</sup> School of Traffic and Environment, Shenzhen Institute of Information Technology, ShenZhen 518172, China; couscous\_yuan@sina.com

<sup>2</sup> School of Civil Engineering, University of Science and Technology Liaoning, AnShan 114051, China

<sup>3</sup> Department of Civil Engineering, COMSATS University Islamabad, Abbottabad 22060, Pakistan; ayazahmad@cuatd.edu.pk

<sup>4</sup> MaREI Centre, Ryan Institute and School of Engineering, College of Science and Engineering, National University of Ireland, Galway, Ireland

<sup>5</sup> Peter the Great St. Petersburg Polytechnic University, 195291 St. Petersburg, Russia; usanova\_kyu@spbstu.ru

<sup>6</sup> Department of Civil Engineering, College of Engineering in Al-Kharj, Prince Sattam bin Abdulaziz University, Al-Kharj 11942, Saudi Arabia; a.bilal@psau.edu.sa

<sup>7</sup> Building & Construction Technology Department, Bayan College of Science and Technology, Khartoum 11115, Sudan

<sup>8</sup> Structural Engineering and Construction Management, Faculty of Engineering and Technology, Future University in Egypt, New Cairo 11845, Egypt; rana.khallaf@fue.edu.eg

\* Correspondence: 319933700033@ustl.edu.cn (Y.T.); waqasahmad@cuatd.edu.pk (W.A.)

**Citation:** Yuan, X.; Tian, Y.; Ahmad, W.; Ahmad, A.; Usanova, K.I.; Mohamed, A.M.; Khallaf, R. Machine Learning Prediction Models to Evaluate the Strength of Recycled Aggregate Concrete. *Materials* **2022**, *15*, 2823. <https://doi.org/10.3390/ma15082823>

Academic Editor: Krzysztof Schabowicz

Received: 4 March 2022

Accepted: 27 March 2022

Published: 12 April 2022

**Publisher's Note:** MDPI stays neutral with regard to jurisdictional claims in published maps and institutional affiliations.

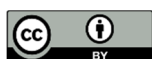

**Copyright:** © 2022 by the authors. Licensee MDPI, Basel, Switzerland. This article is an open access article distributed under the terms and conditions of the Creative Commons Attribution (CC BY) license (<https://creativecommons.org/licenses/by/4.0/>).

Table S1. Data used for modeling.

| Ref. | Effective water-cement ratio ( $w_{eff}/c$ ) | Aggregate-cement ratio ( $a/c$ ) | RCA replacement ratio (RCA %) | Parent concrete strength (MPa) | Nominal Maximum RCA size (mm) | Nominal Maximum NA size (mm) | Bulk density of RCA ( $kg/m^3$ ) | Bulk density of NA ( $kg/m^3$ ) | Water absorption of RCA (%) | Water absorption of NA (%) | Los Angeles abrasion of RCA | Los Angeles abrasion of NA | Compressive strength (MPa) | Flexural strength (MPa) |
|------|----------------------------------------------|----------------------------------|-------------------------------|--------------------------------|-------------------------------|------------------------------|----------------------------------|---------------------------------|-----------------------------|----------------------------|-----------------------------|----------------------------|----------------------------|-------------------------|
| [1]  | 0.5                                          | 2.6                              | 0                             | 0                              | 20                            | 20                           | 0                                | 0                               | 0                           | 0                          | 0                           | 0                          | 42.8                       | 0                       |
|      | 0.5                                          | 2.5                              | 20                            | 0                              | 20                            | 20                           | 0                                | 0                               | 0                           | 0                          | 0                           | 0                          | 42.7                       | 0                       |
|      | 0.5                                          | 2.5                              | 50                            | 0                              | 20                            | 20                           | 0                                | 0                               | 0                           | 0                          | 0                           | 0                          | 41.3                       | 0                       |
|      | 0.5                                          | 2.3                              | 100                           | 0                              | 20                            | 20                           | 0                                | 0                               | 0                           | 0                          | 0                           | 0                          | 41.8                       | 0                       |
| [2]  | 0.45                                         | 3.3                              | 0                             | 0                              | 20                            | 30                           | 0                                | 2610                            | 0                           | 2.5                        | 0                           | 0                          | 51.2                       | 5.2                     |
|      | 0.45                                         | 3.3                              | 30                            | 0                              | 20                            | 30                           | 2400                             | 2610                            | 4.9                         | 2.5                        | 0                           | 0                          | 50.6                       | 5.2                     |
|      | 0.45                                         | 3.3                              | 50                            | 0                              | 20                            | 30                           | 2400                             | 2610                            | 4.9                         | 2.5                        | 0                           | 0                          | 50.8                       | 4.9                     |
|      | 0.45                                         | 3.3                              | 100                           | 0                              | 20                            | 30                           | 2400                             | 0                               | 4.9                         | 0                          | 0                           | 0                          | 50.2                       | 5                       |
|      | 0.39                                         | 2.6                              | 0                             | 0                              | 20                            | 30                           | 0                                | 2610                            | 0                           | 2.5                        | 0                           | 0                          | 60.3                       | 6                       |
|      | 0.39                                         | 2.6                              | 30                            | 0                              | 20                            | 30                           | 2400                             | 2610                            | 4.9                         | 2.5                        | 0                           | 0                          | 60.8                       | 6.1                     |
|      | 0.39                                         | 2.6                              | 50                            | 0                              | 20                            | 30                           | 2400                             | 2610                            | 4.9                         | 2.5                        | 0                           | 0                          | 61.2                       | 6.1                     |
|      | 0.39                                         | 2.6                              | 100                           | 0                              | 20                            | 30                           | 2400                             | 0                               | 4.9                         | 0                          | 0                           | 0                          | 60.2                       | 6                       |
|      | 0.29                                         | 2.2                              | 0                             | 0                              | 20                            | 30                           | 0                                | 2610                            | 0                           | 2.5                        | 0                           | 0                          | 70.5                       | 7                       |
|      | 0.29                                         | 2.2                              | 30                            | 0                              | 20                            | 30                           | 2400                             | 2610                            | 4.9                         | 2.5                        | 0                           | 0                          | 70.2                       | 6.9                     |
|      | 0.29                                         | 2.2                              | 50                            | 0                              | 20                            | 30                           | 2400                             | 2610                            | 4.9                         | 2.5                        | 0                           | 0                          | 70.8                       | 7                       |
|      | 0.29                                         | 2.2                              | 100                           | 0                              | 20                            | 30                           | 2400                             | 0                               | 4.9                         | 0                          | 0                           | 0                          | 70                         | 7.2                     |
|      | 0.36                                         | 2.4                              | 0                             | 41.6                           | 16                            | 16                           | 0                                | 0                               | 0                           | 0                          | 0                           | 0                          | 48.4                       | 0                       |
|      | 0.36                                         | 2.3                              | 100                           | 41.6                           | 16                            | 16                           | 0                                | 0                               | 0                           | 0                          | 0                           | 0                          | 44.5                       | 0                       |
| [3]  | 0.36                                         | 2.2                              | 100                           | 41.6                           | 16                            | 16                           | 0                                | 0                               | 0                           | 0                          | 0                           | 0                          | 38.7                       | 0                       |
|      | 0.36                                         | 2.4                              | 0                             | 50.6                           | 16                            | 16                           | 0                                | 0                               | 0                           | 0                          | 0                           | 0                          | 48.9                       | 0                       |
|      | 0.36                                         | 2.3                              | 100                           | 50.6                           | 16                            | 16                           | 0                                | 0                               | 0                           | 0                          | 0                           | 0                          | 46.1                       | 0                       |
|      | 0.36                                         | 2.2                              | 100                           | 50.6                           | 16                            | 16                           | 0                                | 0                               | 0                           | 0                          | 0                           | 0                          | 42.4                       | 0                       |
|      | 0.36                                         | 2.4                              | 0                             | 63.2                           | 16                            | 16                           | 0                                | 0                               | 0                           | 0                          | 0                           | 0                          | 48.9                       | 0                       |
|      | 0.36                                         | 2.3                              | 100                           | 63.2                           | 16                            | 16                           | 0                                | 0                               | 0                           | 0                          | 0                           | 0                          | 52.5                       | 0                       |
|      | 0.36                                         | 2.2                              | 100                           | 63.2                           | 16                            | 16                           | 0                                | 0                               | 0                           | 0                          | 0                           | 0                          | 50.7                       | 0                       |
|      | 0.36                                         | 2.4                              | 0                             | 35.6                           | 16                            | 16                           | 0                                | 0                               | 0                           | 0                          | 0                           | 0                          | 48.9                       | 0                       |
|      | 0.36                                         | 2.3                              | 100                           | 35.6                           | 16                            | 16                           | 0                                | 0                               | 0                           | 0                          | 0                           | 0                          | 45.2                       | 0                       |
|      | 0.36                                         | 2.2                              | 100                           | 35.6                           | 16                            | 16                           | 0                                | 0                               | 0                           | 0                          | 0                           | 0                          | 45.2                       | 0                       |

|     |      |     |     |      |    |    |      |      |     |     |   |   |      |   |
|-----|------|-----|-----|------|----|----|------|------|-----|-----|---|---|------|---|
|     | 0.36 | 2.2 | 100 | 35.6 | 16 | 16 | 0    | 0    | 0   | 0   | 0 | 0 | 42   | 0 |
|     | 0.36 | 2.4 | 0   | 66   | 16 | 16 | 0    | 0    | 0   | 0   | 0 | 0 | 48.9 | 0 |
|     | 0.36 | 2.3 | 100 | 66   | 16 | 16 | 0    | 0    | 0   | 0   | 0 | 0 | 49.6 | 0 |
|     | 0.36 | 2.2 | 100 | 66   | 16 | 16 | 0    | 0    | 0   | 0   | 0 | 0 | 45.1 | 0 |
|     | 0.36 | 2.7 | 0   | 72.3 | 16 | 16 | 0    | 0    | 0   | 0   | 0 | 0 | 52.3 | 0 |
|     | 0.36 | 2.4 | 100 | 72.3 | 16 | 16 | 0    | 0    | 0   | 0   | 0 | 0 | 54.4 | 0 |
|     | 0.36 | 2.3 | 100 | 72.3 | 16 | 16 | 0    | 0    | 0   | 0   | 0 | 0 | 48.2 | 0 |
| [4] | 0.47 | 2.5 | 0   | 38.4 | 20 | 20 | 0    | 2590 | 0   | 0.9 | 0 | 0 | 39   | 0 |
|     | 0.47 | 2.5 | 15  | 38.4 | 20 | 20 | 2410 | 2590 | 5.8 | 0.9 | 0 | 0 | 38.1 | 0 |
|     | 0.45 | 2.5 | 30  | 38.4 | 20 | 20 | 2410 | 2590 | 5.8 | 0.9 | 0 | 0 | 37   | 0 |
|     | 0.42 | 2.4 | 60  | 38.4 | 20 | 20 | 2410 | 2590 | 5.8 | 0.9 | 0 | 0 | 35.8 | 0 |
|     | 0.38 | 2.3 | 100 | 38.4 | 20 | 20 | 2410 | 0    | 5.8 | 0   | 0 | 0 | 34.5 | 0 |
| [5] | 0.6  | 4.6 | 0   | 0    | 15 | 20 | 0    | 2670 | 0   | 0.5 | 0 | 0 | 43.5 | 0 |
|     | 0.6  | 4.1 | 100 | 0    | 15 | 20 | 2450 | 0    | 5.6 | 0   | 0 | 0 | 38.2 | 0 |
|     | 0.45 | 3.3 | 0   | 0    | 15 | 20 | 0    | 2670 | 0   | 0.5 | 0 | 0 | 61.7 | 0 |
|     | 0.45 | 2.9 | 100 | 0    | 15 | 20 | 2450 | 0    | 5.6 | 0   | 0 | 0 | 52.8 | 0 |
|     | 0.35 | 2.6 | 0   | 0    | 15 | 20 | 0    | 2670 | 0   | 0.5 | 0 | 0 | 74.4 | 0 |
|     | 0.35 | 2.3 | 100 | 0    | 15 | 20 | 2450 | 0    | 5.6 | 0   | 0 | 0 | 62.8 | 0 |
|     | 0.45 | 3.2 | 25  | 0    | 15 | 20 | 0    | 2670 | 0   | 0.5 | 0 | 0 | 60.7 | 0 |
|     | 0.45 | 3.1 | 50  | 0    | 15 | 20 | 2450 | 0    | 5.6 | 0   | 0 | 0 | 59.4 | 0 |
| [6] | 0.57 | 3.1 | 0   | 0    | 20 | 25 | 0    | 2620 | 0   | 1.3 | 0 | 0 | 48.3 | 0 |
|     | 0.57 | 3.1 | 20  | 0    | 20 | 25 | 2330 | 2620 | 6.3 | 1.3 | 0 | 0 | 44.9 | 0 |
|     | 0.57 | 3.1 | 50  | 0    | 20 | 32 | 2330 | 2620 | 6.3 | 1.3 | 0 | 0 | 44.7 | 0 |
|     | 0.57 | 3   | 100 | 0    | 20 | 32 | 2330 | 0    | 6.3 | 0   | 0 | 0 | 46.8 | 0 |
|     | 0.57 | 3   | 0   | 0    | 20 | 32 | 0    | 2620 | 0   | 1.3 | 0 | 0 | 40.2 | 0 |
|     | 0.57 | 3.1 | 20  | 0    | 20 | 32 | 2330 | 2620 | 6.3 | 1.3 | 0 | 0 | 43.2 | 0 |
|     | 0.57 | 2.9 | 50  | 0    | 20 | 32 | 2330 | 2620 | 6.3 | 1.3 | 0 | 0 | 39.7 | 0 |
|     | 0.57 | 2.9 | 100 | 0    | 20 | 32 | 2330 | 0    | 6.3 | 0   | 0 | 0 | 43.3 | 0 |
|     | 0.57 | 3   | 0   | 0    | 20 | 20 | 0    | 2620 | 0   | 1.3 | 0 | 0 | 46   | 0 |
|     | 0.57 | 2.8 | 20  | 0    | 20 | 20 | 2330 | 2620 | 6.3 | 1.3 | 0 | 0 | 43   | 0 |
|     | 0.57 | 2.7 | 50  | 0    | 20 | 20 | 2330 | 2620 | 6.3 | 1.3 | 0 | 0 | 38.1 | 0 |
|     | 0.57 | 2.9 | 100 | 0    | 20 | 20 | 2330 | 0    | 6.3 | 0   | 0 | 0 | 39.1 | 0 |
| [7] | 0.5  | 2.4 | 100 | 0    | 25 | 20 | 0    | 0    | 0   | 0   | 0 | 0 | 30.2 | 0 |
|     | 0.5  | 2.3 | 100 | 0    | 25 | 20 | 0    | 0    | 0   | 0   | 0 | 0 | 36.2 | 0 |
|     | 0.7  | 3.3 | 100 | 0    | 25 | 20 | 0    | 0    | 0   | 0   | 0 | 0 | 27.7 | 0 |

|      |      |     |     |   |    |    |      |      |     |     |   |   |      |     |
|------|------|-----|-----|---|----|----|------|------|-----|-----|---|---|------|-----|
|      | 0.7  | 3.2 | 100 | 0 | 25 | 20 | 0    | 0    | 0   | 0   | 0 | 0 | 20.4 | 0   |
| [8]  | 0.43 | 3   | 0   | 0 | 32 | 19 | 0    | 2820 | 0   | 0.4 | 0 | 0 | 35.9 | 0   |
|      | 0.43 | 2.9 | 33  | 0 | 32 | 19 | 2520 | 2820 | 9.3 | 0.4 | 0 | 0 | 34.1 | 0   |
|      | 0.43 | 2.8 | 53  | 0 | 32 | 19 | 2520 | 2820 | 9.3 | 0.4 | 0 | 0 | 29.6 | 0   |
|      | 0.43 | 2.8 | 72  | 0 | 32 | 19 | 2520 | 2820 | 9.3 | 0.4 | 0 | 0 | 30.3 | 0   |
|      | 0.43 | 2.7 | 100 | 0 | 32 | 19 | 2520 | 0    | 9.3 | 0   | 0 | 0 | 26.7 | 0   |
| [9]  | 0.42 | 3   | 0   | 0 | 32 | 32 | 0    | 2786 | 0   | 0.3 | 0 | 0 | 36.8 | 5   |
|      | 0.37 | 2.9 | 30  | 0 | 32 | 32 | 2442 | 2786 | 6   | 0.3 | 0 | 0 | 37.2 | 5   |
|      | 0.34 | 2.8 | 50  | 0 | 32 | 32 | 2442 | 2786 | 6   | 0.3 | 0 | 0 | 37.8 | 5.2 |
|      | 0.38 | 2   | 70  | 0 | 32 | 32 | 2442 | 2786 | 6   | 0.3 | 0 | 0 | 36.7 | 5.1 |
|      | 0.27 | 2.7 | 100 | 0 | 32 | 32 | 2442 | 0    | 6   | 0   | 0 | 0 | 35.2 | 4.9 |
| [10] | 0.55 | 4   | 0   | 0 | 25 | 19 | 0    | 2670 | 0   | 0.9 | 0 | 0 | 42   | 0   |
|      | 0.55 | 3.9 | 25  | 0 | 25 | 19 | 2430 | 2670 | 4.4 | 0.9 | 0 | 0 | 42   | 0   |
|      | 0.52 | 3.6 | 50  | 0 | 25 | 19 | 2430 | 2670 | 4.4 | 0.9 | 0 | 0 | 41   | 0   |
|      | 0.5  | 3.5 | 100 | 0 | 25 | 19 | 2430 | 0    | 4.4 | 0   | 0 | 0 | 40   | 0   |
| [11] | 0.55 | 4   | 0   | 0 | 25 | 19 | 0    | 2670 | 0   | 0.9 | 0 | 0 | 35.5 | 0   |
|      | 0.55 | 3.9 | 25  | 0 | 25 | 19 | 2430 | 2670 | 4.5 | 0.9 | 0 | 0 | 38.8 | 0   |
|      | 0.52 | 3.6 | 50  | 0 | 25 | 19 | 2430 | 2670 | 4.5 | 0.9 | 0 | 0 | 39.4 | 0   |
|      | 0.5  | 3.5 | 100 | 0 | 25 | 19 | 2430 | 0    | 4.5 | 0   | 0 | 0 | 38.3 | 0   |
| [12] | 0.41 | 3.1 | 0   | 0 | 20 | 25 | 0    | 2564 | 0   | 0.8 | 0 | 0 | 59.4 | 0   |
|      | 0.42 | 3.2 | 10  | 0 | 20 | 25 | 2165 | 2564 | 6.8 | 0.8 | 0 | 0 | 62.2 | 0   |
|      | 0.43 | 3.4 | 20  | 0 | 20 | 25 | 2165 | 2564 | 6.8 | 0.8 | 0 | 0 | 58.4 | 0   |
|      | 0.44 | 3.5 | 30  | 0 | 20 | 25 | 2165 | 2564 | 6.8 | 0.8 | 0 | 0 | 61.3 | 0   |
|      | 0.45 | 3.7 | 50  | 0 | 20 | 25 | 2165 | 2564 | 6.8 | 0.8 | 0 | 0 | 60.8 | 0   |
|      | 0.45 | 4.4 | 100 | 0 | 20 | 25 | 2165 | 0    | 6.8 | 0   | 0 | 0 | 61   | 0   |
| [13] | 0.51 | 2.6 | 0   | 0 | 20 | 20 | 0    | 2620 | 0   | 1.1 | 0 | 0 | 48.6 | 0   |
|      | 0.49 | 2.5 | 20  | 0 | 20 | 20 | 2570 | 2620 | 3.5 | 1.1 | 0 | 0 | 45.3 | 0   |
|      | 0.48 | 2.5 | 50  | 0 | 20 | 20 | 2570 | 2620 | 3.5 | 1.1 | 0 | 0 | 42.5 | 0   |
|      | 0.46 | 2.5 | 80  | 0 | 20 | 20 | 2570 | 2620 | 3.5 | 1.1 | 0 | 0 | 39.2 | 0   |
|      | 0.45 | 2.5 | 100 | 0 | 20 | 20 | 2570 | 0    | 3.5 | 0   | 0 | 0 | 37.1 | 0   |
| [14] | 0.49 | 4.7 | 0   | 0 | 16 | 20 | 2270 | 0    | 0   | 0   | 0 | 0 | 37.7 | 0   |
|      | 0.49 | 3.9 | 100 | 0 | 16 | 20 | 2270 | 0    | 0   | 0   | 0 | 0 | 34.6 | 0   |
|      | 0.36 | 2.4 | 0   | 0 | 16 | 20 | 2270 | 0    | 0   | 0   | 0 | 0 | 57.9 | 0   |
|      | 0.36 | 2.2 | 100 | 0 | 16 | 20 | 2270 | 0    | 0   | 0   | 0 | 0 | 56.4 | 0   |
|      | 0.49 | 3.7 | 0   | 0 | 16 | 25 | 2780 | 0    | 0   | 0   | 0 | 0 | 39.8 | 0   |

|      |      |     |     |   |    |    |      |      |     |     |   |   |      |     |
|------|------|-----|-----|---|----|----|------|------|-----|-----|---|---|------|-----|
|      | 0.49 | 4.4 | 100 | 0 | 16 | 25 | 2780 | 0    | 0   | 0   | 0 | 0 | 40.1 | 0   |
|      | 0.36 | 2.4 | 0   | 0 | 16 | 25 | 2780 | 0    | 0   | 0   | 0 | 0 | 58.3 | 0   |
|      | 0.36 | 2.3 | 100 | 0 | 16 | 25 | 2780 | 0    | 0   | 0   | 0 | 0 | 60.2 | 0   |
|      | 0.49 | 5.1 | 0   | 0 | 16 | 16 | 2565 | 0    | 0   | 0   | 0 | 0 | 40.1 | 0   |
|      | 0.49 | 4.2 | 100 | 0 | 16 | 16 | 2565 | 0    | 0   | 0   | 0 | 0 | 35.3 | 0   |
|      | 0.36 | 2.7 | 0   | 0 | 16 | 16 | 2565 | 0    | 0   | 0   | 0 | 0 | 61.8 | 0   |
|      | 0.36 | 2.4 | 100 | 0 | 16 | 16 | 2565 | 0    | 0   | 0   | 0 | 0 | 57.5 | 0   |
| [15] | 0.47 | 3.3 | 0   | 0 | 32 | 22 | 0    | 2788 | 0   | 0.3 | 0 | 0 | 31.2 | 4.6 |
|      | 0.41 | 3.3 | 30  | 0 | 32 | 22 | 2449 | 2788 | 6   | 0.3 | 0 | 0 | 31   | 4.6 |
|      | 0.38 | 3.2 | 50  | 0 | 32 | 22 | 2449 | 2788 | 6   | 0.3 | 0 | 0 | 29.3 | 4.4 |
|      | 0.36 | 3.1 | 70  | 0 | 32 | 22 | 2449 | 2788 | 6   | 0.3 | 0 | 0 | 28.4 | 4.4 |
|      | 0.32 | 3   | 100 | 0 | 32 | 22 | 2449 | 0    | 6   | 0   | 0 | 0 | 27.2 | 4.2 |
| [16] | 0.45 | 2.8 | 0   | 0 | 20 | 19 | 0    | 2620 | 0   | 1.1 | 0 | 0 | 66.8 | 0   |
|      | 0.45 | 2.8 | 20  | 0 | 20 | 19 | 2570 | 2620 | 3.5 | 1.1 | 0 | 0 | 62.4 | 0   |
|      | 0.45 | 2.7 | 50  | 0 | 20 | 19 | 2570 | 2620 | 3.5 | 1.1 | 0 | 0 | 55.8 | 0   |
|      | 0.45 | 2.7 | 100 | 0 | 20 | 32 | 2570 | 0    | 3.5 | 0   | 0 | 0 | 42   | 0   |
|      | 0.55 | 2.6 | 0   | 0 | 20 | 32 | 0    | 2620 | 0   | 1.1 | 0 | 0 | 48.6 | 0   |
|      | 0.55 | 2.5 | 20  | 0 | 20 | 32 | 2570 | 2620 | 3.5 | 1.1 | 0 | 0 | 45.3 | 0   |
|      | 0.55 | 2.5 | 50  | 0 | 20 | 32 | 2570 | 2620 | 3.5 | 1.1 | 0 | 0 | 42.5 | 0   |
|      | 0.55 | 2.5 | 100 | 0 | 20 | 32 | 2570 | 0    | 3.5 | 0   | 0 | 0 | 38.1 | 0   |
| [17] | 0.65 | 3.1 | 0   | 0 | 19 | 25 | 0    | 2860 | 0   | 0.7 | 0 | 0 | 21.8 | 0   |
|      | 0.65 | 3.1 | 100 | 0 | 19 | 25 | 2390 | 0    | 4.4 | 0   | 0 | 0 | 22.1 | 0   |
|      | 0.5  | 2.9 | 0   | 0 | 19 | 25 | 0    | 2860 | 0   | 0.7 | 0 | 0 | 26.7 | 0   |
|      | 0.5  | 2.9 | 100 | 0 | 19 | 25 | 2390 | 0    | 4.4 | 0   | 0 | 0 | 25.1 | 0   |
|      | 0.48 | 2.8 | 0   | 0 | 19 | 25 | 0    | 2860 | 0   | 0.7 | 0 | 0 | 28.9 | 0   |
|      | 0.48 | 2.8 | 100 | 0 | 19 | 25 | 2390 | 0    | 4.4 | 0   | 0 | 0 | 27.2 | 0   |
|      | 0.43 | 2.6 | 0   | 0 | 19 | 25 | 0    | 2860 | 0   | 0.7 | 0 | 0 | 31.1 | 0   |
|      | 0.43 | 2.6 | 100 | 0 | 19 | 25 | 2390 | 0    | 4.4 | 0   | 0 | 0 | 28.7 | 0   |
|      | 0.4  | 2.4 | 0   | 0 | 19 | 19 | 0    | 2860 | 0   | 0.7 | 0 | 0 | 33.7 | 0   |
|      | 0.4  | 2.4 | 100 | 0 | 19 | 19 | 2390 | 0    | 4.4 | 0   | 0 | 0 | 29.5 | 0   |
| [18] | 0.54 | 3.1 | 0   | 0 | 32 | 25 | 0    | 2840 | 0   | 0.4 | 0 | 0 | 26.8 | 0   |
|      | 0.35 | 3.1 | 100 | 0 | 32 | 25 | 2512 | 0    | 6.3 | 0   | 0 | 0 | 24.6 | 0   |
|      | 0.49 | 3.1 | 100 | 0 | 32 | 25 | 2670 | 0    | 1.8 | 0   | 0 | 0 | 26.9 | 0   |
|      | 0.46 | 2.7 | 0   | 0 | 32 | 25 | 0    | 2840 | 0   | 0.4 | 0 | 0 | 34.3 | 0   |
|      | 0.31 | 2.7 | 100 | 0 | 32 | 32 | 2512 | 0    | 6.3 | 0   | 0 | 0 | 30.2 | 0   |

|      |      |     |     |   |    |    |      |      |     |     |    |    |      |     |
|------|------|-----|-----|---|----|----|------|------|-----|-----|----|----|------|-----|
|      | 0.43 | 2.7 | 100 | 0 | 32 | 32 | 2670 | 0    | 1.8 | 0   | 0  | 0  | 34.2 | 0   |
|      | 0.42 | 2.4 | 0   | 0 | 32 | 32 | 0    | 2840 | 0   | 0.4 | 0  | 0  | 38.6 | 0   |
|      | 0.28 | 2.4 | 100 | 0 | 32 | 32 | 2512 | 0    | 6.3 | 0   | 0  | 0  | 35.5 | 0   |
|      | 0.39 | 2.4 | 100 | 0 | 32 | 32 | 2670 | 0    | 1.8 | 0   | 0  | 0  | 38.4 | 0   |
| [19] | 0.7  | 4.1 | 0   | 0 | 30 | 10 | 0    | 2700 | 0   | 0.5 | 0  | 28 | 18.1 | 0   |
|      | 0.67 | 3.9 | 100 | 0 | 30 | 10 | 2520 | 0    | 3.8 | 0   | 34 | 0  | 18   | 0   |
|      | 0.67 | 3.9 | 100 | 0 | 30 | 10 | 2510 | 0    | 3.9 | 0   | 39 | 0  | 15.4 | 0   |
|      | 0.35 | 3.1 | 0   | 0 | 30 | 10 | 0    | 2700 | 0   | 0.5 | 0  | 28 | 37.5 | 0   |
|      | 0.35 | 4.3 | 100 | 0 | 30 | 10 | 2520 | 0    | 3.8 | 0   | 34 | 0  | 36.4 | 0   |
|      | 0.36 | 2.1 | 100 | 0 | 30 | 10 | 2510 | 0    | 3.9 | 0   | 39 | 0  | 35.7 | 0   |
|      | 0.34 | 2.1 | 0   | 0 | 30 | 19 | 0    | 2700 | 0   | 0.5 | 0  | 28 | 48.4 | 0   |
|      | 0.34 | 1.9 | 100 | 0 | 30 | 19 | 2520 | 0    | 3.8 | 0   | 34 | 0  | 44.4 | 0   |
|      | 0.34 | 2.2 | 100 | 0 | 30 | 30 | 2510 | 0    | 3.9 | 0   | 39 | 0  | 43.8 | 0   |
| [20] | 0.47 | 3.3 | 0   | 0 | 32 | 22 | 0    | 2788 | 0   | 0.3 | 0  | 0  | 31.2 | 4.6 |
|      | 0.41 | 3.3 | 30  | 0 | 32 | 22 | 2449 | 2788 | 6   | 0.3 | 0  | 0  | 31   | 4.6 |
|      | 0.38 | 3.2 | 50  | 0 | 32 | 22 | 2449 | 2788 | 6   | 0.3 | 0  | 0  | 29.3 | 4.4 |
|      | 0.36 | 3.1 | 70  | 0 | 32 | 22 | 2449 | 2788 | 6   | 0.3 | 0  | 0  | 28.4 | 4.4 |
|      | 0.32 | 3   | 100 | 0 | 32 | 25 | 2449 | 0    | 6   | 0   | 0  | 0  | 27.2 | 4.2 |
| [21] | 0.55 | 2.6 | 0   | 0 | 20 | 20 | 0    | 2620 | 0   | 1.1 | 0  | 0  | 48.6 | 0   |
|      | 0.55 | 2.6 | 20  | 0 | 20 | 20 | 2580 | 2620 | 3.5 | 1.1 | 0  | 0  | 45.3 | 0   |
|      | 0.55 | 2.5 | 50  | 0 | 20 | 20 | 2580 | 2620 | 3.5 | 1.1 | 0  | 0  | 42.5 | 0   |
|      | 0.55 | 2.5 | 100 | 0 | 20 | 20 | 2580 | 0    | 3.5 | 0   | 0  | 0  | 38.1 | 0   |
|      | 0.5  | 2.6 | 0   | 0 | 20 | 20 | 0    | 2620 | 0   | 1.1 | 0  | 0  | 54.1 | 0   |
|      | 0.5  | 2.6 | 20  | 0 | 20 | 20 | 2580 | 2620 | 3.5 | 1.1 | 0  | 0  | 51.7 | 0   |
|      | 0.5  | 2.6 | 50  | 0 | 20 | 20 | 2580 | 2620 | 3.5 | 1.1 | 0  | 0  | 47.1 | 0   |
|      | 0.5  | 2.6 | 100 | 0 | 20 | 20 | 2580 | 0    | 3.5 | 0   | 0  | 0  | 43.4 | 0   |
|      | 0.45 | 2.8 | 0   | 0 | 20 | 20 | 0    | 2620 | 0   | 1.1 | 0  | 0  | 66.8 | 0   |
|      | 0.45 | 2.8 | 20  | 0 | 20 | 20 | 2580 | 2620 | 3.5 | 1.1 | 0  | 0  | 62.4 | 0   |
|      | 0.45 | 2.7 | 50  | 0 | 20 | 20 | 2580 | 2620 | 3.5 | 1.1 | 0  | 0  | 56.8 | 0   |
|      | 0.45 | 2.5 | 100 | 0 | 20 | 20 | 2580 | 0    | 3.5 | 0   | 0  | 0  | 52.1 | 0   |
|      | 0.4  | 2.9 | 0   | 0 | 20 | 20 | 0    | 2620 | 0   | 1.1 | 0  | 0  | 72.3 | 0   |
|      | 0.4  | 2.8 | 20  | 0 | 20 | 20 | 2580 | 2620 | 3.5 | 1.1 | 0  | 0  | 69.6 | 0   |
|      | 0.4  | 2.8 | 50  | 0 | 20 | 20 | 2580 | 2620 | 3.5 | 1.1 | 0  | 0  | 65.3 | 0   |
|      | 0.4  | 2.8 | 100 | 0 | 20 | 20 | 2580 | 0    | 3.5 | 0   | 0  | 0  | 58.5 | 0   |
| [22] | 0.5  | 2.9 | 0   | 0 | 25 | 20 | 0    | 2600 | 0   | 1.4 | 0  | 0  | 39.5 | 4   |

|      |      |     |     |   |    |    |      |      |     |     |      |      |      |     |
|------|------|-----|-----|---|----|----|------|------|-----|-----|------|------|------|-----|
|      | 0.5  | 2.9 | 30  | 0 | 25 | 20 | 2530 | 2600 | 1.9 | 1.4 | 0    | 0    | 36.7 | 4   |
|      | 0.5  | 2.9 | 50  | 0 | 25 | 20 | 2530 | 2600 | 1.9 | 1.4 | 0    | 0    | 38   | 3.7 |
|      | 0.5  | 2.8 | 100 | 0 | 25 | 32 | 2530 | 0    | 1.9 | 0   | 0    | 0    | 36   | 3.5 |
|      | 0.5  | 2.8 | 30  | 0 | 25 | 32 | 0    | 2600 | 0   | 1.4 | 0    | 0    | 32.6 | 3.6 |
|      | 0.5  | 2.8 | 50  | 0 | 25 | 32 | 2400 | 2600 | 6.2 | 1.4 | 0    | 0    | 30.4 | 3.4 |
|      | 0.5  | 2.7 | 100 | 0 | 25 | 32 | 2400 | 0    | 6.2 | 0   | 0    | 0    | 29.5 | 3.2 |
| [23] | 0.58 | 3.2 | 0   | 0 | 32 | 32 | 0    | 2970 | 0   | 0.8 | 0    | 0    | 44.6 | 0   |
|      | 0.52 | 3.2 | 50  | 0 | 32 | 22 | 2720 | 2970 | 4.8 | 0.8 | 0    | 0    | 41.4 | 0   |
|      | 0.45 | 3.2 | 100 | 0 | 32 | 22 | 2720 | 0    | 4.8 | 0   | 0    | 0    | 40.7 | 0   |
|      | 0.52 | 3.2 | 50  | 0 | 32 | 22 | 2650 | 2970 | 4.6 | 0.8 | 0    | 0    | 38.3 | 0   |
|      | 0.46 | 3.2 | 100 | 0 | 32 | 22 | 2650 | 0    | 4.6 | 0   | 0    | 0    | 36.6 | 0   |
|      | 0.52 | 3.2 | 50  | 0 | 32 | 22 | 2880 | 2970 | 4.4 | 0.8 | 0    | 0    | 41.2 | 0   |
|      | 0.47 | 3.2 | 100 | 0 | 32 | 22 | 2880 | 0    | 4.4 | 0   | 0    | 0    | 40.3 | 0   |
| [24] | 0.41 | 2.6 | 0   | 0 | 20 | 20 | 0    | 2647 | 0   | 1   | 0    | 27.8 | 42.3 | 0   |
|      | 0.39 | 2.5 | 20  | 0 | 20 | 20 | 2338 | 2647 | 5.2 | 1   | 40.2 | 27.8 | 47.4 | 0   |
|      | 0.36 | 2.5 | 50  | 0 | 20 | 20 | 2338 | 2647 | 5.2 | 1   | 40.2 | 27.8 | 47.3 | 0   |
|      | 0.32 | 2.3 | 100 | 0 | 20 | 20 | 2338 | 0    | 5.2 | 0   | 40.2 | 0    | 54.8 | 0   |
| [25] | 0.52 | 2.9 | 0   | 0 | 22 | 20 | 0    | 0    | 0   | 0   | 0    | 0    | 48   | 0   |
|      | 0.52 | 2.9 | 10  | 0 | 22 | 20 | 0    | 0    | 0   | 0   | 0    | 0    | 46.9 | 0   |
|      | 0.52 | 2.8 | 20  | 0 | 22 | 20 | 0    | 0    | 0   | 0   | 0    | 0    | 47.7 | 0   |
|      | 0.52 | 2.8 | 30  | 0 | 22 | 20 | 0    | 0    | 0   | 0   | 0    | 0    | 50.8 | 0   |
|      | 0.52 | 2.8 | 40  | 0 | 22 | 20 | 0    | 0    | 0   | 0   | 0    | 0    | 48   | 0   |
|      | 0.52 | 2.8 | 50  | 0 | 22 | 25 | 0    | 0    | 0   | 0   | 0    | 0    | 49.5 | 0   |
|      | 0.52 | 2.7 | 100 | 0 | 22 | 25 | 0    | 0    | 0   | 0   | 0    | 0    | 50.3 | 0   |
|      | 0.54 | 3.2 | 0   | 0 | 22 | 25 | 0    | 0    | 0   | 0   | 0    | 0    | 23.5 | 3.1 |
|      | 0.54 | 3.1 | 25  | 0 | 22 | 25 | 0    | 0    | 0   | 0   | 0    | 0    | 21.6 | 2.9 |
|      | 0.54 | 3.1 | 100 | 0 | 22 | 20 | 0    | 0    | 0   | 0   | 0    | 0    | 20.5 | 3.1 |
| [26] | 0.76 | 4.5 | 100 | 0 | 30 | 32 | 0    | 0    | 0   | 0   | 0    | 0    | 21.1 | 0   |
|      | 0.76 | 4.5 | 100 | 0 | 30 | 32 | 0    | 0    | 0   | 0   | 0    | 0    | 22   | 0   |
|      | 0.76 | 4.5 | 100 | 0 | 30 | 32 | 0    | 0    | 0   | 0   | 0    | 0    | 23.1 | 0   |
|      | 0.76 | 4.5 | 100 | 0 | 30 | 32 | 0    | 0    | 0   | 0   | 0    | 0    | 23.5 | 0   |
|      | 0.76 | 4.5 | 100 | 0 | 30 | 32 | 0    | 0    | 0   | 0   | 0    | 0    | 20.4 | 0   |
|      | 0.76 | 4.5 | 100 | 0 | 30 | 32 | 0    | 0    | 0   | 0   | 0    | 0    | 18.9 | 0   |
|      | 0.76 | 4.5 | 100 | 0 | 30 | 32 | 0    | 0    | 0   | 0   | 0    | 0    | 21.2 | 0   |
|      | 0.66 | 3.9 | 100 | 0 | 30 | 32 | 0    | 0    | 0   | 0   | 0    | 0    | 25.7 | 0   |

|      |      |     |     |   |    |    |      |      |     |     |   |   |      |     |
|------|------|-----|-----|---|----|----|------|------|-----|-----|---|---|------|-----|
|      | 0.66 | 3.9 | 100 | 0 | 30 | 32 | 0    | 0    | 0   | 0   | 0 | 0 | 28   | 0   |
|      | 0.66 | 3.9 | 100 | 0 | 30 | 32 | 0    | 0    | 0   | 0   | 0 | 0 | 25.1 | 0   |
|      | 0.66 | 3.9 | 100 | 0 | 30 | 32 | 0    | 0    | 0   | 0   | 0 | 0 | 27.5 | 0   |
|      | 0.66 | 3.9 | 100 | 0 | 30 | 32 | 0    | 0    | 0   | 0   | 0 | 0 | 26.1 | 0   |
|      | 0.66 | 3.9 | 100 | 0 | 30 | 32 | 0    | 0    | 0   | 0   | 0 | 0 | 27.4 | 0   |
|      | 0.66 | 3.9 | 100 | 0 | 30 | 32 | 0    | 0    | 0   | 0   | 0 | 0 | 27.7 | 0   |
|      | 0.66 | 3.9 | 100 | 0 | 30 | 32 | 0    | 0    | 0   | 0   | 0 | 0 | 25   | 0   |
|      | 0.57 | 3.3 | 100 | 0 | 30 | 32 | 0    | 0    | 0   | 0   | 0 | 0 | 30.5 | 0   |
|      | 0.57 | 3.3 | 100 | 0 | 30 | 30 | 0    | 0    | 0   | 0   | 0 | 0 | 32.7 | 0   |
|      | 0.57 | 3.3 | 100 | 0 | 30 | 30 | 0    | 0    | 0   | 0   | 0 | 0 | 32.8 | 0   |
|      | 0.57 | 3.3 | 100 | 0 | 30 | 30 | 0    | 0    | 0   | 0   | 0 | 0 | 33.1 | 0   |
|      | 0.48 | 2.7 | 100 | 0 | 30 | 30 | 0    | 0    | 0   | 0   | 0 | 0 | 35.3 | 0   |
|      | 0.48 | 2.7 | 100 | 0 | 30 | 30 | 0    | 0    | 0   | 0   | 0 | 0 | 35.2 | 0   |
|      | 0.48 | 2.7 | 100 | 0 | 30 | 30 | 0    | 0    | 0   | 0   | 0 | 0 | 32.5 | 0   |
|      | 0.48 | 2.7 | 100 | 0 | 30 | 30 | 0    | 0    | 0   | 0   | 0 | 0 | 33.8 | 0   |
|      | 0.41 | 2.2 | 100 | 0 | 30 | 30 | 0    | 0    | 0   | 0   | 0 | 0 | 41.9 | 0   |
|      | 0.41 | 2.2 | 100 | 0 | 30 | 30 | 0    | 0    | 0   | 0   | 0 | 0 | 38.4 | 0   |
|      | 0.41 | 2.2 | 100 | 0 | 30 | 30 | 0    | 0    | 0   | 0   | 0 | 0 | 38.7 | 0   |
|      | 0.41 | 2.2 | 100 | 0 | 30 | 30 | 0    | 0    | 0   | 0   | 0 | 0 | 41.2 | 0   |
| [27] | 0.54 | 3.1 | 0   | 0 | 32 | 32 | 0    | 2840 | 0   | 0.4 | 0 | 0 | 26.8 | 4.2 |
|      | 0.35 | 3.1 | 100 | 0 | 32 | 32 | 2512 | 0    | 6.3 | 0   | 0 | 0 | 24.6 | 4.2 |
|      | 0.49 | 3.1 | 100 | 0 | 32 | 32 | 2670 | 0    | 1.8 | 0   | 0 | 0 | 26.9 | 4.2 |
|      | 0.46 | 3.3 | 0   | 0 | 32 | 32 | 0    | 2840 | 0   | 0.4 | 0 | 0 | 34.3 | 4.8 |
|      | 0.27 | 3.3 | 100 | 0 | 32 | 32 | 2512 | 0    | 6.3 | 0   | 0 | 0 | 30.2 | 4.7 |
|      | 0.41 | 3.3 | 100 | 0 | 32 | 32 | 2670 | 0    | 1.8 | 0   | 0 | 0 | 34.2 | 4.8 |
|      | 0.42 | 3   | 0   | 0 | 32 | 32 | 0    | 2840 | 0   | 0.4 | 0 | 0 | 38.6 | 5.1 |
|      | 0.24 | 3   | 100 | 0 | 32 | 32 | 2512 | 0    | 6.3 | 0   | 0 | 0 | 35.5 | 5   |
|      | 0.38 | 3   | 100 | 0 | 32 | 32 | 2670 | 0    | 1.8 | 0   | 0 | 0 | 38.4 | 5.1 |
| [28] | 0.4  | 3.1 | 50  | 0 | 12 | 30 | 2420 | 2570 | 6.8 | 3   | 0 | 0 | 43.3 | 0   |
|      | 0.45 | 3.1 | 50  | 0 | 12 | 30 | 2400 | 2570 | 6.8 | 3   | 0 | 0 | 39.6 | 0   |
|      | 0.5  | 3.2 | 50  | 0 | 12 | 30 | 2400 | 2570 | 6.8 | 3   | 0 | 0 | 38.1 | 0   |
|      | 0.55 | 3.2 | 50  | 0 | 12 | 30 | 2400 | 2570 | 6.8 | 3   | 0 | 0 | 34.5 | 0   |
|      | 0.6  | 3.3 | 50  | 0 | 12 | 30 | 2400 | 2570 | 6.8 | 3   | 0 | 0 | 31.6 | 0   |
|      | 0.4  | 3.1 | 50  | 0 | 22 | 30 | 2420 | 2570 | 8.8 | 3   | 0 | 0 | 46.1 | 0   |
|      | 0.45 | 3.1 | 50  | 0 | 22 | 30 | 2420 | 2570 | 8.8 | 3   | 0 | 0 | 45.8 | 0   |



|      |      |     |     |   |    |    |      |      |     |     |      |      |      |     |
|------|------|-----|-----|---|----|----|------|------|-----|-----|------|------|------|-----|
|      | 0.5  | 3.2 | 50  | 0 | 22 | 30 | 2420 | 2570 | 8.8 | 3   | 0    | 0    | 39.9 | 0   |
|      | 0.55 | 3.3 | 50  | 0 | 22 | 20 | 2420 | 2570 | 8.8 | 3   | 0    | 0    | 36.3 | 0   |
|      | 0.6  | 3.3 | 50  | 0 | 22 | 20 | 2420 | 2570 | 8.8 | 3   | 0    | 0    | 34.7 | 0   |
| [29] | 0.5  | 3.5 | 0   | 0 | 20 | 20 | 0    | 2870 | 0   | 0   | 0    | 0    | 28.3 | 4.9 |
|      | 0.5  | 3.5 | 20  | 0 | 20 | 20 | 2400 | 2870 | 0   | 0   | 0    | 0    | 27.2 | 3.9 |
|      | 0.5  | 3.5 | 40  | 0 | 20 | 20 | 2400 | 2870 | 0   | 0   | 0    | 0    | 26.5 | 2.9 |
|      | 0.5  | 3.5 | 60  | 0 | 20 | 20 | 2400 | 2870 | 0   | 0   | 0    | 0    | 25.4 | 2.7 |
|      | 0.5  | 3.5 | 80  | 0 | 20 | 20 | 2400 | 2870 | 0   | 0   | 0    | 0    | 25.1 | 2.6 |
|      | 0.5  | 3.5 | 100 | 0 | 20 | 20 | 2400 | 0    | 0   | 0   | 0    | 0    | 20.4 | 2.4 |
|      | 0.5  | 3.8 | 20  | 0 | 20 | 20 | 2630 | 2870 | 0   | 0   | 0    | 0    | 26.4 | 4.4 |
|      | 0.5  | 4.1 | 40  | 0 | 20 | 20 | 2630 | 2870 | 0   | 0   | 0    | 0    | 25.9 | 4.1 |
|      | 0.5  | 4.5 | 60  | 0 | 20 | 20 | 2630 | 2870 | 0   | 0   | 0    | 0    | 23.5 | 3.8 |
|      | 0.5  | 4.8 | 80  | 0 | 20 | 20 | 2630 | 2870 | 0   | 0   | 0    | 0    | 15.4 | 3.4 |
| [30] | 0.51 | 3.6 | 0   | 0 | 32 | 20 | 0    | 2671 | 0   | 0.3 | 0    | 29.2 | 43.4 | 5.4 |
|      | 0.57 | 3.6 | 50  | 0 | 32 | 20 | 2489 | 2671 | 2.4 | 0.3 | 34   | 29.2 | 45.2 | 5.7 |
|      | 0.62 | 3.6 | 100 | 0 | 32 | 20 | 2489 | 0    | 2.4 | 0   | 34   | 0    | 45.7 | 5.2 |
| [31] | 0.65 | 3.3 | 0   | 0 | 19 | 20 | 0    | 2720 | 0   | 0.2 | 0    | 25   | 20.2 | 0   |
|      | 0.65 | 3.2 | 25  | 0 | 19 | 20 | 2440 | 2720 | 5.8 | 0.2 | 33.6 | 25   | 18.5 | 0   |
|      | 0.65 | 3.1 | 50  | 0 | 19 | 20 | 2440 | 2720 | 5.8 | 0.2 | 33.6 | 25   | 18   | 0   |
|      | 0.65 | 3.1 | 75  | 0 | 19 | 20 | 2440 | 2720 | 5.8 | 0.2 | 0    | 25   | 16.5 | 0   |
|      | 0.42 | 2.7 | 0   | 0 | 19 | 20 | 0    | 2720 | 0   | 0.2 | 33.6 | 25   | 40   | 0   |
|      | 0.42 | 2.7 | 25  | 0 | 19 | 20 | 2440 | 2720 | 5.8 | 0.2 | 33.6 | 25   | 33   | 0   |
|      | 0.42 | 2.6 | 50  | 0 | 19 | 20 | 2440 | 2720 | 5.8 | 0.2 | 33.6 | 25   | 34.5 | 0   |
|      | 0.42 | 2.5 | 75  | 0 | 19 | 20 | 2440 | 2720 | 5.8 | 0.2 | 33.6 | 25   | 34   | 0   |
| [32] | 0.65 | 3.4 | 0   | 0 | 16 | 20 | 0    | 2730 | 0   | 2.5 | 0    | 0    | 31.9 | 0   |
|      | 0.66 | 3.3 | 20  | 0 | 16 | 20 | 2400 | 2730 | 5   | 2.5 | 0    | 0    | 31.7 | 0   |
|      | 0.68 | 3.1 | 50  | 0 | 16 | 20 | 2400 | 2730 | 5   | 2.5 | 0    | 0    | 32.4 | 0   |
|      | 0.68 | 2.8 | 100 | 0 | 16 | 20 | 2400 | 0    | 5   | 0   | 0    | 0    | 30.1 | 0   |
|      | 0.5  | 2.6 | 0   | 0 | 16 | 20 | 0    | 2730 | 0   | 2.5 | 0    | 0    | 44.8 | 0   |
|      | 0.51 | 2.5 | 20  | 0 | 16 | 20 | 2400 | 2730 | 5   | 2.5 | 0    | 0    | 43.7 | 0   |
|      | 0.53 | 2.3 | 50  | 0 | 16 | 20 | 2400 | 2730 | 5   | 2.5 | 0    | 0    | 37.5 | 0   |
|      | 0.56 | 2.1 | 100 | 0 | 16 | 20 | 2400 | 0    | 5   | 0   | 0    | 0    | 40.5 | 0   |
| [33] | 0.45 | 1.9 | 0   | 0 | 19 | 25 | 2420 | 0    | 5.4 | 0.9 | 0    | 0    | 35.2 | 0   |
|      | 0.45 | 3.4 | 64  | 0 | 19 | 25 | 2420 | 2740 | 5.4 | 0.9 | 0    | 0    | 41.4 | 0   |
|      | 0.45 | 2.3 | 100 | 0 | 19 | 25 | 2420 | 2740 | 5.4 | 0   | 0    | 0    | 43.9 | 0   |

|      |      |     |     |      |    |    |      |      |     |      |      |      |      |     |
|------|------|-----|-----|------|----|----|------|------|-----|------|------|------|------|-----|
|      | 0.45 | 2.1 | 0   | 0    | 19 | 25 | 2500 | 0    | 3.3 | 0.9  | 0    | 0    | 34.1 | 0   |
|      | 0.45 | 3.1 | 64  | 0    | 19 | 25 | 2500 | 2740 | 3.3 | 0.9  | 0    | 0    | 44.8 | 0   |
|      | 0.45 | 2.5 | 100 | 0    | 19 | 25 | 2500 | 2740 | 3.3 | 0    | 0    | 0    | 45.9 | 0   |
| [34] | 0.65 | 3.4 | 0   | 0    | 16 | 20 | 0    | 2720 | 0   | 2    | 0    | 23   | 31.9 | 0   |
|      | 0.65 | 3.3 | 20  | 0    | 16 | 20 | 2400 | 2720 | 5   | 2    | 34   | 23   | 31.7 | 0   |
|      | 0.65 | 3.1 | 50  | 0    | 16 | 20 | 2400 | 2720 | 5   | 2    | 34   | 23   | 32.4 | 0   |
|      | 0.65 | 2.8 | 100 | 0    | 16 | 20 | 2400 | 0    | 5   | 0    | 34   | 0    | 30.1 | 0   |
|      | 0.5  | 2.6 | 0   | 0    | 16 | 20 | 0    | 2720 | 0   | 2    | 0    | 23   | 44.8 | 0   |
|      | 0.5  | 2.5 | 20  | 0    | 16 | 20 | 2400 | 2720 | 5   | 2    | 34   | 23   | 43.7 | 0   |
|      | 0.5  | 2.8 | 50  | 0    | 16 | 20 | 2400 | 2720 | 5   | 2    | 34   | 23   | 37.5 | 0   |
|      | 0.5  | 2.1 | 100 | 0    | 16 | 20 | 2400 | 0    | 5   | 0    | 34   | 0    | 40.5 | 0   |
| [35] | 0.43 | 3.1 | 0   | 0    | 20 | 20 | 0    | 2620 | 0   | 1.1  | 0    | 21.6 | 51.8 | 5.2 |
|      | 0.43 | 3   | 25  | 0    | 20 | 20 | 2661 | 2620 | 1.9 | 1.1  | 0    | 21.6 | 47   | 4.2 |
|      | 0.43 | 2.9 | 50  | 0    | 20 | 20 | 2602 | 2620 | 2.6 | 1.1  | 0    | 21.6 | 46   | 4.4 |
|      | 0.43 | 2.8 | 100 | 0    | 20 | 20 | 2510 | 0    | 3.9 | 0    | 38.8 | 0    | 42.5 | 5   |
| [36] | 0.45 | 2.3 | 0   | 0    | 19 | 25 | 0    | 2730 | 0   | 0.45 | 0    | 23   | 44.4 | 0   |
|      | 0.45 | 2.3 | 100 | 0    | 19 | 25 | 2490 | 0    | 4.8 | 0    | 37   | 0    | 41   | 0   |
|      | 0.55 | 2.9 | 0   | 0    | 19 | 25 | 0    | 2730 | 0   | 0.45 | 0    | 23   | 36.7 | 0   |
|      | 0.55 | 2.9 | 100 | 0    | 19 | 25 | 2490 | 0    | 4.8 | 0    | 37   | 0    | 33.3 | 0   |
|      | 0.65 | 3.5 | 0   | 0    | 19 | 25 | 0    | 2730 | 0   | 0.45 | 0    | 23   | 30.4 | 0   |
|      | 0.65 | 3.5 | 100 | 0    | 19 | 25 | 2490 | 0    | 4.8 | 0    | 37   | 0    | 24.8 | 0   |
| [37] | 0.6  | 4.6 | 0   | 0    | 19 | 20 | 0    | 0    | 0   | 0    | 0    | 0    | 25   | 0   |
|      | 0.6  | 4.6 | 25  | 0    | 19 | 20 | 0    | 0    | 0   | 0    | 0    | 0    | 26.7 | 0   |
|      | 0.6  | 4.5 | 50  | 0    | 19 | 20 | 0    | 0    | 0   | 0    | 0    | 0    | 21.5 | 0   |
|      | 0.6  | 4.5 | 75  | 0    | 19 | 20 | 0    | 0    | 0   | 0    | 0    | 0    | 21.4 | 0   |
|      | 0.6  | 4.4 | 100 | 0    | 19 | 20 | 0    | 0    | 0   | 0    | 0    | 0    | 20   | 0   |
|      | 0.45 | 2.6 | 0   | 0    | 19 | 20 | 0    | 0    | 0   | 0    | 0    | 0    | 39.5 | 0   |
|      | 0.45 | 2.6 | 25  | 0    | 19 | 20 | 0    | 0    | 0   | 0    | 0    | 0    | 38.3 | 0   |
|      | 0.45 | 2.5 | 50  | 0    | 19 | 20 | 0    | 0    | 0   | 0    | 0    | 0    | 37   | 0   |
|      | 0.45 | 2.5 | 75  | 0    | 19 | 19 | 0    | 0    | 0   | 0    | 0    | 0    | 35   | 0   |
|      | 0.45 | 2.5 | 100 | 0    | 19 | 19 | 0    | 0    | 0   | 0    | 0    | 0    | 33.3 | 0   |
| [38] | 0.49 | 3.1 | 0   | 0    | 25 | 16 | 0    | 2710 | 0   | 0.8  | 0    | 0    | 44.3 | 0   |
|      | 0.37 | 3   | 100 | 26.3 | 25 | 16 | 2490 | 0    | 2.9 | 0    | 0    | 0    | 37.6 | 0   |
|      | 0.43 | 3   | 100 | 42.7 | 25 | 16 | 2570 | 0    | 2.9 | 0    | 0    | 0    | 43.3 | 0   |
|      | 0.36 | 2.9 | 100 | 42.7 | 25 | 16 | 2440 | 0    | 5.6 | 0    | 0    | 0    | 42.6 | 0   |

|      |      |     |     |      |    |    |      |      |     |     |   |   |      |     |
|------|------|-----|-----|------|----|----|------|------|-----|-----|---|---|------|-----|
|      | 0.36 | 2.9 | 100 | 65.3 | 25 | 16 | 2470 | 0    | 5.3 | 0   | 0 | 0 | 44.7 | 0   |
| [39] | 0.53 | 6.5 | 0   | 0    | 32 | 15 | 0    | 2650 | 0   | 0.2 | 0 | 0 | 39.3 | 4.4 |
|      | 0.43 | 5.4 | 100 | 0    | 32 | 15 | 2263 | 0    | 6   | 0   | 0 | 0 | 33.2 | 4.3 |
|      | 0.49 | 5.1 | 100 | 0    | 32 | 15 | 2283 | 0    | 4.2 | 0   | 0 | 0 | 35.6 | 4.8 |
|      | 0.53 | 5.1 | 100 | 0    | 32 | 15 | 2292 | 0    | 4.3 | 0   | 0 | 0 | 34.6 | 5   |
|      | 0.6  | 5.3 | 100 | 0    | 32 | 15 | 2301 | 0    | 5   | 0   | 0 | 0 | 37.3 | 5.1 |
|      | 0.54 | 6.4 | 90  | 0    | 32 | 15 | 2609 | 2650 | 1.5 | 0.2 | 0 | 0 | 45.4 | 4.4 |
|      | 0.46 | 5.9 | 60  | 0    | 32 | 15 | 2518 | 2650 | 2.7 | 0.2 | 0 | 0 | 54.3 | 5.9 |
|      | 0.44 | 5.8 | 60  | 0    | 32 | 15 | 2584 | 2650 | 1.6 | 0.2 | 0 | 0 | 54.4 | 6.4 |
|      | 0.45 | 6.4 | 25  | 0    | 32 | 32 | 2594 | 2650 | 1.6 | 0.2 | 0 | 0 | 53.4 | 6   |
| [40] | 0.43 | 3   | 0   | 0    | 32 | 25 | 0    | 0    | 0   | 0   | 0 | 0 | 34.8 | 0   |
|      | 0.47 | 2.9 | 30  | 0    | 32 | 32 | 0    | 0    | 0   | 0   | 0 | 0 | 31.9 | 0   |
|      | 0.49 | 2.8 | 50  | 0    | 32 | 32 | 0    | 0    | 0   | 0   | 0 | 0 | 30.6 | 0   |
|      | 0.54 | 2.7 | 100 | 0    | 32 | 32 | 0    | 0    | 0   | 0   | 0 | 0 | 29.7 | 0   |
| [41] | 0.66 | 4.6 | 0   | 0    | 20 | 22 | 0    | 2510 | 0   | 1.4 | 0 | 0 | 21   | 0   |
|      | 0.66 | 4.6 | 30  | 0    | 20 | 22 | 2340 | 2510 | 5.3 | 1.4 | 0 | 0 | 20   | 0   |
|      | 0.61 | 4.3 | 50  | 0    | 20 | 22 | 2340 | 2510 | 5.3 | 1.4 | 0 | 0 | 19   | 0   |
|      | 0.58 | 4   | 100 | 0    | 20 | 22 | 2340 | 0    | 5.3 | 0   | 0 | 0 | 18   | 0   |
|      | 0.55 | 3.8 | 0   | 0    | 20 | 22 | 0    | 2510 | 0   | 1.4 | 0 | 0 | 21   | 0   |
|      | 0.55 | 3.8 | 30  | 0    | 20 | 22 | 2340 | 2510 | 5.3 | 1.4 | 0 | 0 | 23   | 0   |
|      | 0.51 | 3.5 | 50  | 0    | 20 | 22 | 2340 | 2510 | 5.3 | 1.4 | 0 | 0 | 24   | 0   |
|      | 0.48 | 3.4 | 100 | 0    | 20 | 22 | 2340 | 0    | 5.3 | 0   | 0 | 0 | 21   | 0   |
|      | 0.5  | 3.5 | 0   | 0    | 20 | 22 | 0    | 2510 | 0   | 1.4 | 0 | 0 | 31   | 0   |
|      | 0.5  | 3.5 | 30  | 0    | 20 | 22 | 2340 | 2510 | 5.3 | 1.4 | 0 | 0 | 25   | 0   |
|      | 0.47 | 3.2 | 50  | 0    | 20 | 22 | 2340 | 2510 | 5.3 | 1.4 | 0 | 0 | 29   | 0   |
|      | 0.44 | 3   | 100 | 0    | 20 | 22 | 2340 | 0    | 5.3 | 0   | 0 | 0 | 30   | 0   |
|      | 0.48 | 3.3 | 0   | 0    | 20 | 22 | 0    | 2510 | 0   | 1.4 | 0 | 0 | 33   | 0   |
|      | 0.48 | 3.3 | 30  | 0    | 20 | 12 | 2340 | 2510 | 5.3 | 1.4 | 0 | 0 | 39   | 0   |
|      | 0.44 | 3.1 | 50  | 0    | 20 | 22 | 2340 | 2510 | 5.3 | 1.4 | 0 | 0 | 31   | 0   |
|      | 0.42 | 2.9 | 100 | 0    | 20 | 22 | 2340 | 0    | 5.3 | 0   | 0 | 0 | 34   | 0   |
| [42] | 0.6  | 4.3 | 0   | 0    | 32 | 20 | 0    | 2381 | 0   | 0   | 0 | 0 | 36.6 | 0   |
|      | 0.6  | 3.8 | 100 | 0    | 32 | 20 | 2264 | 0    | 2   | 0   | 0 | 0 | 33.6 | 0   |
|      | 0.52 | 3.6 | 0   | 0    | 32 | 20 | 0    | 2389 | 0   | 0   | 0 | 0 | 41.8 | 0   |
|      | 0.52 | 3.2 | 100 | 0    | 32 | 25 | 2276 | 0    | 2   | 0   | 0 | 0 | 41.1 | 0   |
|      | 0.47 | 3   | 0   | 0    | 32 | 25 | 0    | 2387 | 0   | 0   | 0 | 0 | 48.6 | 0   |

|      |      |     |     |      |    |    |      |      |      |     |      |      |      |     |
|------|------|-----|-----|------|----|----|------|------|------|-----|------|------|------|-----|
|      | 0.47 | 2.7 | 100 | 0    | 32 | 25 | 2273 | 0    | 2    | 0   | 0    | 0    | 48.1 | 0   |
| [43] | 0.6  | 3   | 0   | 37.3 | 12 | 20 | 0    | 2720 | 0    | 0.6 | 0    | 0    | 39.5 | 0   |
|      | 0.59 | 3.2 | 10  | 37.3 | 12 | 20 | 2010 | 2720 | 10.9 | 0.6 | 0    | 0    | 40   | 0   |
|      | 0.57 | 3.5 | 30  | 37.3 | 12 | 20 | 2010 | 2720 | 10.9 | 0.6 | 0    | 0    | 38.6 | 0   |
|      | 0.54 | 3.8 | 50  | 37.3 | 12 | 20 | 2010 | 2720 | 10.9 | 0.6 | 0    | 0    | 37.6 | 0   |
|      | 0.46 | 4.6 | 100 | 37.3 | 12 | 20 | 2010 | 0    | 10.9 | 0   | 0    | 0    | 38.6 | 0   |
|      | 0.45 | 3.2 | 0   | 37.3 | 12 | 20 | 0    | 2720 | 0    | 0.6 | 0    | 0    | 53.3 | 0   |
|      | 0.44 | 3.3 | 10  | 37.3 | 12 | 20 | 2010 | 2720 | 10.9 | 0.6 | 0    | 0    | 53.7 | 0   |
|      | 0.42 | 3.7 | 30  | 37.3 | 12 | 20 | 2010 | 2720 | 10.9 | 0.6 | 0    | 0    | 51   | 0   |
|      | 0.67 | 4   | 50  | 37.3 | 12 | 20 | 2010 | 2720 | 10.9 | 0.6 | 0    | 0    | 47.8 | 0   |
|      | 0.68 | 4.8 | 100 | 37.3 | 12 | 20 | 2010 | 0    | 10.9 | 0   | 0    | 0    | 45.1 | 0   |
|      | 0.67 | 3.3 | 0   | 37.3 | 12 | 20 | 0    | 2720 | 0    | 0.6 | 0    | 0    | 65.2 | 0   |
|      | 0.7  | 3.4 | 10  | 37.3 | 12 | 20 | 2010 | 2720 | 10.9 | 0.6 | 0    | 0    | 64.6 | 0   |
|      | 0.53 | 3.8 | 30  | 37.3 | 12 | 20 | 2010 | 2720 | 10.9 | 0.6 | 0    | 0    | 65.4 | 0   |
|      | 0.53 | 4.1 | 50  | 37.3 | 12 | 20 | 2010 | 2720 | 10.9 | 0.6 | 0    | 0    | 63.2 | 0   |
|      | 0.53 | 5   | 100 | 37.3 | 12 | 20 | 2010 | 0    | 10.9 | 0   | 0    | 0    | 63   | 0   |
| [44] | 0.54 | 3   | 0   | 41.4 | 20 | 22 | 0    | 2581 | 0    | 1.2 | 0    | 24.8 | 49.8 | 0   |
|      | 0.54 | 3   | 20  | 41.4 | 20 | 22 | 2451 | 2581 | 7.3  | 1.2 | 40   | 24.8 | 50.5 | 0   |
|      | 0.54 | 3   | 50  | 41.4 | 20 | 22 | 2451 | 2581 | 7.3  | 1.2 | 40   | 24.8 | 48.1 | 0   |
|      | 0.54 | 2.9 | 100 | 41.4 | 20 | 22 | 2451 | 0    | 7.3  | 0   | 40   | 0    | 45.2 | 0   |
|      | 0.45 | 3.1 | 0   | 41.4 | 20 | 22 | 0    | 2581 | 0    | 1.2 | 0    | 24.8 | 59.7 | 0   |
|      | 0.45 | 3.1 | 20  | 41.4 | 20 | 22 | 2451 | 2581 | 7.3  | 1.2 | 40   | 24.8 | 64.7 | 0   |
|      | 0.45 | 3.1 | 50  | 41.4 | 20 | 22 | 2451 | 2581 | 7.3  | 1.2 | 40   | 24.8 | 55   | 0   |
|      | 0.45 | 3.1 | 100 | 41.4 | 20 | 22 | 2451 | 0    | 7.3  | 0   | 40   | 0    | 53.9 | 0   |
|      | 0.4  | 3.2 | 0   | 41.4 | 20 | 22 | 0    | 2581 | 0    | 1.2 | 0    | 24.8 | 78.7 | 0   |
|      | 0.4  | 3.2 | 20  | 41.4 | 20 | 22 | 2451 | 2581 | 7.3  | 1.2 | 40   | 24.8 | 69.9 | 0   |
|      | 0.4  | 3.2 | 50  | 41.4 | 20 | 22 | 2451 | 2581 | 7.3  | 1.2 | 40   | 24.8 | 63.8 | 0   |
|      | 0.4  | 3.1 | 100 | 41.4 | 20 | 22 | 2451 | 0    | 7.3  | 0   | 40   | 0    | 62.8 | 0   |
| [45] | 0.48 | 4.1 | 0   | 0    | 10 | 20 | 0    | 2670 | 0    | 1.5 | 0    | 11.9 | 38.9 | 5.8 |
|      | 0.48 | 3.5 | 100 | 0    | 10 | 20 | 2360 | 0    | 4.7  | 0   | 15.1 | 0    | 38.6 | 5.2 |
|      | 0.39 | 3.1 | 100 | 0    | 10 | 20 | 2280 | 0    | 6.2  | 0   | 22.1 | 0    | 38.1 | 5.2 |
|      | 0.29 | 2.6 | 100 | 0    | 10 | 20 | 2220 | 0    | 7.8  | 0   | 25   | 0    | 39.3 | 5.2 |
|      | 0.34 | 2.3 | 0   | 0    | 10 | 20 | 0    | 2670 | 0    | 1.5 | 0    | 11.9 | 61.9 | 5.2 |
|      | 0.31 | 2.1 | 100 | 0    | 10 | 20 | 2360 | 0    | 4.7  | 0   | 15.1 | 0    | 60.1 | 5.8 |
|      | 0.27 | 1.8 | 100 | 0    | 10 | 20 | 2280 | 0    | 6.2  | 0   | 22.1 | 0    | 60.2 | 5   |

|      |      |     |     |   |    |    |      |      |     |      |    |   |      |     |
|------|------|-----|-----|---|----|----|------|------|-----|------|----|---|------|-----|
|      | 0.19 | 1.5 | 100 | 0 | 10 | 20 | 2220 | 0    | 7.8 | 0    | 25 | 0 | 62.8 | 4.4 |
| [46] | 0.52 | 3   | 100 | 0 | 25 | 20 | 2490 | 0    | 4.9 | 0    | 0  | 0 | 37.6 | 0   |
|      | 0.52 | 3   | 100 | 0 | 25 | 20 | 2570 | 0    | 2.9 | 0    | 0  | 0 | 43.3 | 0   |
|      | 0.52 | 2.9 | 100 | 0 | 25 | 20 | 2440 | 0    | 5.6 | 0    | 0  | 0 | 42.6 | 0   |
|      | 0.52 | 2.9 | 100 | 0 | 25 | 32 | 2470 | 0    | 5.3 | 0    | 0  | 0 | 44.7 | 0   |
|      | 0.52 | 3.1 | 0   | 0 | 25 | 32 | 0    | 2710 | 0   | 0.83 | 0  | 0 | 44.3 | 0   |
|      | 0.58 | 3.2 | 0   | 0 | 32 | 16 | 0    | 2970 | 0   | 0.8  | 0  | 0 | 44.6 | 0   |
|      | 0.52 | 3.2 | 53  | 0 | 32 | 16 | 2720 | 2970 | 4.8 | 0.8  | 0  | 0 | 41.4 | 0   |
| [47] | 0.58 | 3.2 | 100 | 0 | 32 | 16 | 2720 | 0    | 4.8 | 0    | 0  | 0 | 40.7 | 0   |
|      | 0.52 | 3.2 | 54  | 0 | 32 | 25 | 2650 | 2970 | 4.6 | 0.8  | 0  | 0 | 38.3 | 0   |
|      | 0.58 | 3.2 | 100 | 0 | 32 | 25 | 2650 | 0    | 4.6 | 0    | 0  | 0 | 36.6 | 0   |
|      | 0.52 | 3.2 | 53  | 0 | 32 | 25 | 2880 | 2970 | 4.4 | 0.8  | 0  | 0 | 41.2 | 0   |
|      | 0.58 | 3.2 | 100 | 0 | 32 | 25 | 2880 | 0    | 4.4 | 0    | 0  | 0 | 40.3 | 0   |
| [48] | 0.41 | 1.7 | 15  | 0 | 20 | 32 | 2330 | 2600 | 4.4 | 0.7  | 0  | 0 | 50.8 | 0   |
|      | 0.41 | 1.7 | 30  | 0 | 20 | 32 | 2330 | 2600 | 4.4 | 0.7  | 0  | 0 | 44.9 | 0   |
|      | 0.41 | 1.7 | 45  | 0 | 20 | 32 | 2330 | 2600 | 4.4 | 0.7  | 0  | 0 | 44.6 | 0   |
|      | 0.41 | 1.7 | 60  | 0 | 20 | 32 | 2330 | 2600 | 4.4 | 0.7  | 0  | 0 | 42.4 | 0   |
|      | 0.41 | 1.7 | 15  | 0 | 20 | 32 | 2370 | 2600 | 4   | 0.7  | 0  | 0 | 54   | 0   |
|      | 0.41 | 1.7 | 30  | 0 | 20 | 32 | 2370 | 2600 | 4   | 0.7  | 0  | 0 | 56   | 0   |
|      | 0.41 | 1.7 | 45  | 0 | 20 | 32 | 2370 | 2600 | 4   | 0.7  | 0  | 0 | 54.4 | 0   |
|      | 0.41 | 1.7 | 60  | 0 | 20 | 32 | 2370 | 2600 | 4   | 0.7  | 0  | 0 | 40.6 | 0   |
|      | 0.41 | 1.7 | 15  | 0 | 20 | 20 | 2390 | 2600 | 3.6 | 0.7  | 0  | 0 | 55.2 | 0   |
|      | 0.41 | 1.7 | 30  | 0 | 20 | 20 | 2390 | 2600 | 3.6 | 0.7  | 0  | 0 | 53.5 | 0   |
|      | 0.41 | 1.7 | 45  | 0 | 20 | 20 | 2390 | 2600 | 3.6 | 0.7  | 0  | 0 | 56.9 | 0   |
|      | 0.41 | 1.7 | 60  | 0 | 20 | 20 | 2390 | 2600 | 3.6 | 0.7  | 0  | 0 | 54.7 | 0   |
|      | 0.41 | 1.7 | 15  | 0 | 20 | 20 | 2320 | 2600 | 4.6 | 0.7  | 0  | 0 | 50.5 | 0   |
|      | 0.41 | 1.7 | 30  | 0 | 20 | 20 | 2320 | 2600 | 4.6 | 0.7  | 0  | 0 | 48.9 | 0   |
|      | 0.41 | 1.7 | 45  | 0 | 20 | 20 | 2320 | 2600 | 4.6 | 0.7  | 0  | 0 | 45.8 | 0   |
|      | 0.41 | 1.7 | 60  | 0 | 20 | 20 | 2320 | 2600 | 4.6 | 0.7  | 0  | 0 | 40   | 0   |
|      | 0.41 | 1.7 | 15  | 0 | 20 | 20 | 2390 | 2600 | 3.7 | 0.7  | 0  | 0 | 54.4 | 0   |
|      | 0.41 | 1.7 | 30  | 0 | 20 | 20 | 2390 | 2600 | 3.7 | 0.7  | 0  | 0 | 50.2 | 0   |
|      | 0.41 | 1.7 | 45  | 0 | 20 | 20 | 2390 | 2600 | 3.7 | 0.7  | 0  | 0 | 49.5 | 0   |
|      | 0.41 | 1.7 | 60  | 0 | 20 | 20 | 2390 | 2600 | 3.7 | 0.7  | 0  | 0 | 40.4 | 0   |
|      | 0.41 | 1.7 | 15  | 0 | 20 | 20 | 2390 | 2600 | 3.5 | 0.7  | 0  | 0 | 45   | 0   |
|      | 0.41 | 1.7 | 30  | 0 | 20 | 20 | 2390 | 2600 | 3.5 | 0.7  | 0  | 0 | 46.9 | 0   |

|      |      |     |     |    |    |    |      |      |     |     |   |   |      |     |
|------|------|-----|-----|----|----|----|------|------|-----|-----|---|---|------|-----|
|      | 0.41 | 1.7 | 45  | 0  | 20 | 20 | 2390 | 2600 | 3.5 | 0.7 | 0 | 0 | 51.4 | 0   |
|      | 0.41 | 1.7 | 60  | 0  | 20 | 20 | 2390 | 2600 | 3.5 | 0.7 | 0 | 0 | 53.2 | 0   |
|      | 0.41 | 1.7 | 15  | 0  | 20 | 20 | 2380 | 2600 | 3.8 | 0.7 | 0 | 0 | 55.3 | 0   |
|      | 0.41 | 1.7 | 30  | 0  | 20 | 20 | 2380 | 2600 | 3.8 | 0.7 | 0 | 0 | 55.9 | 0   |
|      | 0.41 | 1.7 | 45  | 0  | 20 | 20 | 2380 | 2600 | 3.8 | 0.7 | 0 | 0 | 52.6 | 0   |
|      | 0.41 | 1.7 | 60  | 0  | 20 | 20 | 2380 | 2600 | 3.8 | 0.7 | 0 | 0 | 48   | 0   |
|      | 0.41 | 1.7 | 15  | 0  | 20 | 20 | 2380 | 2600 | 3.8 | 0.7 | 0 | 0 | 49.1 | 0   |
|      | 0.41 | 1.7 | 30  | 0  | 20 | 20 | 2380 | 2600 | 3.8 | 0.7 | 0 | 0 | 49.9 | 0   |
|      | 0.41 | 1.7 | 45  | 0  | 20 | 20 | 2380 | 2600 | 3.8 | 0.7 | 0 | 0 | 50.3 | 0   |
|      | 0.41 | 1.7 | 60  | 0  | 20 | 20 | 2380 | 2600 | 3.8 | 0.7 | 0 | 0 | 47.5 | 0   |
|      | 0.41 | 1.7 | 15  | 0  | 20 | 20 | 2400 | 2600 | 3.5 | 0.7 | 0 | 0 | 43.2 | 0   |
|      | 0.41 | 1.7 | 30  | 0  | 20 | 20 | 2400 | 2600 | 3.5 | 0.7 | 0 | 0 | 53.7 | 0   |
|      | 0.41 | 1.7 | 45  | 0  | 20 | 20 | 2400 | 2600 | 3.5 | 0.7 | 0 | 0 | 50   | 0   |
|      | 0.41 | 1.7 | 60  | 0  | 20 | 20 | 2400 | 2600 | 3.5 | 0.7 | 0 | 0 | 43.3 | 0   |
|      | 0.41 | 1.7 | 15  | 0  | 20 | 20 | 2370 | 2600 | 4   | 0.7 | 0 | 0 | 52.9 | 0   |
|      | 0.41 | 1.7 | 30  | 0  | 20 | 20 | 2370 | 2600 | 4   | 0.7 | 0 | 0 | 49.9 | 0   |
|      | 0.41 | 1.7 | 45  | 0  | 20 | 20 | 2370 | 2600 | 4   | 0.7 | 0 | 0 | 53.7 | 0   |
|      | 0.41 | 1.7 | 60  | 0  | 20 | 20 | 2370 | 2600 | 4   | 0.7 | 0 | 0 | 46   | 0   |
| [49] | 0.48 | 5.1 | 0   | 36 | 25 | 20 | 0    | 2570 | 0   | 1.2 | 0 | 0 | 41.3 | 6.4 |
|      | 0.48 | 5   | 27  | 36 | 25 | 20 | 2250 | 2570 | 7   | 1.2 | 0 | 0 | 51.4 | 5.8 |
|      | 0.48 | 4.9 | 64  | 36 | 25 | 20 | 2250 | 2570 | 7   | 1.2 | 0 | 0 | 45.6 | 4.9 |
|      | 0.48 | 5   | 37  | 36 | 25 | 20 | 2250 | 2570 | 7   | 1.2 | 0 | 0 | 44.7 | 4.8 |
|      | 0.48 | 5   | 37  | 36 | 25 | 20 | 2250 | 2570 | 7   | 1.2 | 0 | 0 | 41.9 | 5.7 |
| [50] | 0.5  | 2.4 | 100 | 0  | 25 | 32 | 2452 | 0    | 4.1 | 0   | 0 | 0 | 51   | 0   |
|      | 0.5  | 2.4 | 100 | 0  | 25 | 32 | 2452 | 0    | 4.1 | 0   | 0 | 0 | 49   | 0   |
|      | 0.5  | 2.4 | 100 | 0  | 25 | 32 | 2452 | 0    | 4.1 | 0   | 0 | 0 | 48   | 0   |
|      | 0.5  | 2.6 | 0   | 0  | 25 | 32 | 2452 | 2652 | 4.1 | 0.8 | 0 | 0 | 52   | 0   |
|      | 0.5  | 2.5 | 50  | 0  | 25 | 32 | 2452 | 2652 | 4.1 | 0.8 | 0 | 0 | 51   | 0   |
|      | 0.5  | 2.5 | 50  | 0  | 25 | 32 | 2452 | 2652 | 4.1 | 0.8 | 0 | 0 | 51   | 0   |
|      | 0.5  | 2.5 | 50  | 0  | 25 | 32 | 2452 | 2652 | 4.1 | 0.8 | 0 | 0 | 51   | 0   |
|      | 0.5  | 2.5 | 25  | 0  | 25 | 32 | 2452 | 2652 | 4.1 | 0.8 | 0 | 0 | 52   | 0   |
|      | 0.5  | 2.5 | 25  | 0  | 25 | 25 | 2452 | 2652 | 4.1 | 0.8 | 0 | 0 | 50   | 0   |
|      | 0.5  | 2.5 | 25  | 0  | 25 | 25 | 2452 | 2652 | 4.1 | 0.8 | 0 | 0 | 49   | 0   |
| [51] | 0.38 | 2   | 0   | 0  | 25 | 38 | 0    | 2630 | 0   | 1.2 | 0 | 0 | 54.1 | 7.7 |
|      | 0.28 | 2   | 100 | 0  | 25 | 38 | 2260 | 0    | 7.5 | 0   | 0 | 0 | 38.3 | 6.5 |

|      |      |     |     |   |    |    |      |      |     |     |    |    |      |     |
|------|------|-----|-----|---|----|----|------|------|-----|-----|----|----|------|-----|
|      | 0.28 | 2   | 100 | 0 | 25 | 38 | 2260 | 0    | 7.5 | 0   | 0  | 0  | 32.9 | 5.9 |
|      | 0.23 | 2   | 100 | 0 | 25 | 38 | 2260 | 0    | 7.5 | 0   | 0  | 0  | 33.2 | 5.5 |
|      | 0.46 | 2.4 | 0   | 0 | 25 | 38 | 0    | 2630 | 0   | 1.2 | 0  | 0  | 42.2 | 7.1 |
|      | 0.34 | 2.4 | 100 | 0 | 25 | 38 | 2260 | 0    | 7.5 | 0   | 0  | 0  | 31.3 | 5.7 |
|      | 0.34 | 2.4 | 100 | 0 | 25 | 38 | 2260 | 0    | 7.5 | 0   | 0  | 0  | 28.4 | 5.3 |
|      | 0.28 | 2.4 | 100 | 0 | 25 | 38 | 2260 | 0    | 7.5 | 0   | 0  | 0  | 28   | 5.1 |
|      | 0.58 | 3.1 | 0   | 0 | 25 | 25 | 0    | 2630 | 0   | 1.2 | 0  | 0  | 28.8 | 5.9 |
|      | 0.43 | 3.1 | 100 | 0 | 25 | 25 | 2260 | 0    | 7.5 | 0   | 0  | 0  | 26.5 | 5.5 |
|      | 0.43 | 3.1 | 100 | 0 | 25 | 25 | 2260 | 0    | 7.5 | 0   | 0  | 0  | 23.3 | 5.1 |
|      | 0.35 | 3.1 | 100 | 0 | 25 | 25 | 2260 | 0    | 7.5 | 0   | 0  | 0  | 21.6 | 4.7 |
|      | 0.67 | 3.5 | 0   | 0 | 25 | 25 | 0    | 2630 | 0   | 1.2 | 0  | 0  | 23.6 | 5.2 |
|      | 0.49 | 3.5 | 100 | 0 | 25 | 25 | 2260 | 0    | 7.5 | 0   | 0  | 0  | 21.6 | 5.3 |
|      | 0.49 | 3.5 | 100 | 0 | 25 | 25 | 2260 | 0    | 7.5 | 0   | 0  | 0  | 18   | 4.8 |
|      | 0.4  | 3.5 | 100 | 0 | 25 | 25 | 2260 | 0    | 7.5 | 0   | 0  | 0  | 18.8 | 4.5 |
|      | 0.8  | 4.2 | 0   | 0 | 25 | 25 | 0    | 2630 | 0   | 1.2 | 0  | 0  | 17.3 | 4.4 |
|      | 0.59 | 4.2 | 100 | 0 | 25 | 25 | 2260 | 0    | 7.5 | 0   | 0  | 0  | 16.1 | 5.2 |
|      | 0.59 | 4.2 | 100 | 0 | 25 | 25 | 2260 | 0    | 7.5 | 0   | 0  | 0  | 13.4 | 4   |
|      | 0.48 | 4.2 | 100 | 0 | 25 | 25 | 2260 | 0    | 7.5 | 0   | 0  | 0  | 13.9 | 3.9 |
| [52] | 0.6  | 3.6 | 0   | 0 | 20 | 20 | 0    | 2540 | 0   | 1.8 | 0  | 31 | 38   | 0   |
|      | 0    | 0   | 0   | 0 | 0  | 0  | 0    | 0    | 0   | 0   | 0  | 0  | 0    | 0   |
|      | 0.59 | 3.3 | 20  | 0 | 20 | 20 | 2320 | 2540 | 5.3 | 1.8 | 42 | 31 | 41   | 0   |
|      | 0.57 | 3.3 | 50  | 0 | 20 | 20 | 2320 | 2540 | 5.3 | 1.8 | 42 | 31 | 44   | 0   |
|      | 0.54 | 3   | 100 | 0 | 20 | 20 | 2320 | 0    | 5.3 | 0   | 42 | 31 | 45   | 0   |
|      | 0.46 | 2.6 | 0   | 0 | 20 | 20 | 0    | 2540 | 0   | 1.8 | 42 | 0  | 51.5 | 0   |
|      | 0.45 | 2.5 | 20  | 0 | 20 | 20 | 2320 | 2540 | 5.3 | 1.8 | 0  | 31 | 50.5 | 0   |
|      | 0.44 | 2.5 | 50  | 0 | 20 | 20 | 2320 | 2540 | 5.3 | 1.8 | 42 | 31 | 45   | 0   |
|      | 0.42 | 2.3 | 100 | 0 | 20 | 20 | 2320 | 0    | 5.3 | 0   | 42 | 0  | 56   | 0   |
|      | 0.67 | 3.6 | 0   | 0 | 20 | 19 | 0    | 2540 | 0   | 1.8 | 0  | 31 | 37   | 0   |
|      | 0.68 | 3.4 | 20  | 0 | 20 | 19 | 2320 | 2540 | 5.3 | 1.8 | 42 | 31 | 33.5 | 0   |
|      | 0.67 | 3   | 50  | 0 | 20 | 19 | 2320 | 2540 | 5.3 | 1.8 | 42 | 31 | 32   | 0   |
|      | 0.7  | 2.3 | 100 | 0 | 20 | 19 | 2320 | 0    | 5.3 | 0   | 42 | 0  | 32   | 0   |
|      | 0.53 | 2.7 | 0   | 0 | 20 | 19 | 0    | 2540 | 0   | 1.8 | 0  | 31 | 45   | 0   |
|      | 0.53 | 2.5 | 20  | 0 | 20 | 19 | 2320 | 2540 | 5.3 | 1.8 | 42 | 31 | 44   | 0   |
|      | 0.53 | 2.2 | 50  | 0 | 20 | 19 | 2320 | 2540 | 5.3 | 1.8 | 42 | 31 | 41   | 0   |
|      | 0.52 | 1.8 | 100 | 0 | 20 | 19 | 2320 | 0    | 5.3 | 0   | 42 | 0  | 41.5 | 0   |

|      |      |     |     |   |    |    |      |      |     |     |      |      |      |   |
|------|------|-----|-----|---|----|----|------|------|-----|-----|------|------|------|---|
|      | 0.51 | 3.1 | 0   | 0 | 20 | 20 | 0    | 2540 | 0   | 1.8 | 0    | 31   | 46.5 | 0 |
|      | 0.52 | 3.2 | 20  | 0 | 20 | 20 | 2320 | 2540 | 5.3 | 1.8 | 42   | 31   | 44   | 0 |
|      | 0.54 | 3   | 50  | 0 | 20 | 20 | 2320 | 2540 | 5.3 | 1.8 | 42   | 31   | 41   | 0 |
|      | 0.58 | 2.8 | 100 | 0 | 20 | 20 | 2320 | 0    | 5.3 | 0   | 42   | 0    | 33.5 | 0 |
|      | 0.42 | 2.7 | 0   | 0 | 20 | 20 | 0    | 2540 | 0   | 1.8 | 0    | 31   | 58   | 0 |
|      | 0.42 | 2.9 | 20  | 0 | 20 | 20 | 2320 | 2540 | 5.3 | 1.8 | 42   | 31   | 53.5 | 0 |
|      | 0.44 | 2.7 | 50  | 0 | 20 | 20 | 2320 | 2540 | 5.3 | 1.8 | 42   | 31   | 54   | 0 |
|      | 0.49 | 2.5 | 100 | 0 | 20 | 20 | 2320 | 0    | 5.3 | 0   | 42   | 0    | 40   | 0 |
| [53] | 0.42 | 2.6 | 50  | 0 | 20 | 19 | 2330 | 2590 | 6.1 | 1.2 | 34.6 | 29.1 | 41.6 | 0 |
|      | 0.51 | 2.3 | 100 | 0 | 20 | 19 | 2330 | 0    | 6.1 | 0   | 34.6 | 0    | 31.4 | 0 |
|      | 0.52 | 2.6 | 50  | 0 | 20 | 19 | 2330 | 2590 | 6.1 | 1.2 | 34.6 | 29.1 | 35.5 | 0 |
|      | 0.61 | 2.3 | 100 | 0 | 20 | 19 | 2330 | 0    | 6.1 | 0   | 34.6 | 0    | 26   | 0 |
|      | 0.44 | 2.6 | 50  | 0 | 20 | 19 | 2320 | 2590 | 5.8 | 1.2 | 32.2 | 29.1 | 44.6 | 0 |
|      | 0.51 | 2.3 | 100 | 0 | 20 | 19 | 2320 | 0    | 5.8 | 0   | 32.2 | 0    | 36.7 | 0 |
|      | 0.62 | 2.3 | 100 | 0 | 20 | 19 | 2320 | 0    | 5.8 | 0   | 32.2 | 0    | 29.5 | 0 |
|      | 0.41 | 2.8 | 20  | 0 | 20 | 19 | 2360 | 2590 | 3.9 | 1.2 | 30.8 | 29.1 | 46.1 | 0 |
|      | 0.42 | 2.6 | 50  | 0 | 20 | 20 | 2360 | 2590 | 3.9 | 1.2 | 30.8 | 29.1 | 45.1 | 0 |
|      | 0.45 | 2.3 | 100 | 0 | 20 | 20 | 2360 | 0    | 3.9 | 0   | 30.8 | 0    | 42.9 | 0 |
|      | 0.5  | 2.8 | 20  | 0 | 20 | 20 | 2360 | 2590 | 3.9 | 1.2 | 30.8 | 29.1 | 39.3 | 0 |
|      | 0.52 | 2.6 | 50  | 0 | 20 | 20 | 2360 | 2590 | 3.9 | 1.2 | 30.8 | 29.1 | 39.5 | 0 |
|      | 0.54 | 2.3 | 100 | 0 | 20 | 20 | 2360 | 0    | 3.9 | 0   | 30.8 | 0    | 37.7 | 0 |
|      | 0.42 | 2.8 | 20  | 0 | 20 | 20 | 2350 | 2590 | 4.5 | 1.2 | 28.5 | 29.1 | 48.1 | 0 |
|      | 0.43 | 2.6 | 50  | 0 | 20 | 20 | 2350 | 2590 | 4.5 | 1.2 | 28.5 | 29.1 | 41   | 0 |
|      | 0.4  | 2.3 | 100 | 0 | 20 | 20 | 2350 | 0    | 4.5 | 0   | 28.5 | 0    | 38.7 | 0 |
|      | 0.51 | 2.8 | 20  | 0 | 20 | 20 | 2350 | 2590 | 4.5 | 1.2 | 28.5 | 29.1 | 42.7 | 0 |
|      | 0.52 | 2.6 | 50  | 0 | 20 | 20 | 2350 | 2590 | 4.5 | 1.2 | 28.5 | 29.1 | 35.4 | 0 |
|      | 0.5  | 2.3 | 100 | 0 | 20 | 20 | 2350 | 0    | 4.5 | 0   | 28.5 | 0    | 31.4 | 0 |
|      | 0.42 | 2.8 | 20  | 0 | 20 | 20 | 2350 | 2590 | 4.7 | 1.2 | 30.1 | 29.1 | 48.5 | 0 |
|      | 0.42 | 2.6 | 50  | 0 | 20 | 20 | 2350 | 2590 | 4.7 | 1.2 | 30.1 | 29.1 | 45.4 | 0 |
|      | 0.43 | 2.3 | 100 | 0 | 20 | 20 | 2350 | 0    | 4.7 | 0   | 30.1 | 0    | 37   | 0 |
|      | 0.52 | 2.8 | 20  | 0 | 20 | 20 | 2350 | 2590 | 4.7 | 1.2 | 30.1 | 29.1 | 41.3 | 0 |
|      | 0.52 | 2.6 | 50  | 0 | 20 | 20 | 2350 | 2590 | 4.7 | 1.2 | 30.1 | 29.1 | 36.8 | 0 |
|      | 0.56 | 2.3 | 100 | 0 | 20 | 20 | 2350 | 0    | 4.7 | 0   | 30.1 | 0    | 31.2 | 0 |
| [54] | 0.41 | 2.6 | 0   | 0 | 32 | 20 | 0    | 2820 | 0   | 0.4 | 0    | 0    | 47.2 | 0 |
|      | 0.38 | 2.6 | 33  | 0 | 32 | 20 | 2578 | 2820 | 9.3 | 0.4 | 0    | 0    | 42.4 | 0 |



|      |      |     |     |     |    |    |      |      |      |      |      |      |       |     |
|------|------|-----|-----|-----|----|----|------|------|------|------|------|------|-------|-----|
|      | 0.36 | 2.6 | 53  | 0   | 32 | 20 | 2578 | 2820 | 9.3  | 0.4  | 0    | 0    | 45.7  | 0   |
|      | 0.34 | 2.6 | 72  | 0   | 32 | 20 | 2578 | 2820 | 9.3  | 0.4  | 0    | 0    | 36.7  | 0   |
|      | 0.31 | 2.6 | 100 | 0   | 32 | 20 | 2578 | 0    | 9.3  | 0    | 0    | 0    | 38.9  | 0   |
| [55] | 0.47 | 3.8 | 0   | 0   | 20 | 25 | 0    | 2610 | 0    | 1    | 0    | 0    | 53.1  | 0   |
|      | 0.47 | 3.7 | 20  | 0   | 20 | 25 | 2336 | 2610 | 3.6  | 1    | 0    | 0    | 50    | 0   |
|      | 0.47 | 3.6 | 50  | 0   | 20 | 25 | 2315 | 2610 | 3.6  | 1    | 0    | 0    | 45.3  | 0   |
|      | 0.47 | 3.6 | 75  | 0   | 20 | 25 | 2295 | 2610 | 3.6  | 1    | 0    | 0    | 44    | 0   |
|      | 0.47 | 3.5 | 100 | 0   | 20 | 25 | 2273 | 0    | 3.6  | 0    | 0    | 0    | 41.6  | 0   |
| [56] | 0.29 | 2.9 | 0   | 0   | 10 | 10 | 0    | 2680 | 0    | 2.1  | 0    | 24.8 | 102.1 | 6.5 |
|      | 0.29 | 2.8 | 20  | 100 | 10 | 10 | 2470 | 2680 | 3.7  | 2.1  | 24   | 24.8 | 108   | 7.4 |
|      | 0.29 | 2.8 | 50  | 100 | 10 | 10 | 2470 | 2680 | 3.7  | 2.1  | 24   | 24.8 | 104.8 | 7.7 |
|      | 0.29 | 2.7 | 100 | 100 | 10 | 10 | 2470 | 0    | 3.7  | 0    | 24   | 0    | 108.5 | 6.8 |
|      | 0.29 | 2.8 | 20  | 60  | 10 | 10 | 2390 | 2680 | 4.9  | 2.1  | 25.2 | 24.8 | 102.5 | 8   |
|      | 0.29 | 2.7 | 50  | 60  | 10 | 10 | 2390 | 2680 | 4.9  | 2.1  | 25.2 | 24.8 | 103.1 | 6.8 |
|      | 0.29 | 2.6 | 100 | 60  | 10 | 10 | 2390 | 0    | 4.9  | 0    | 25.2 | 0    | 100.8 | 6.3 |
|      | 0.29 | 2.8 | 20  | 40  | 10 | 10 | 2300 | 2680 | 5.9  | 2.1  | 24.3 | 24.8 | 104.3 | 6.7 |
|      | 0.29 | 2.7 | 50  | 40  | 10 | 10 | 2300 | 2680 | 5.9  | 2.1  | 24.3 | 24.8 | 96.8  | 6.8 |
|      | 0.29 | 2.5 | 100 | 40  | 10 | 10 | 2300 | 0    | 5.9  | 0    | 24.3 | 0    | 91.2  | 6.5 |
| [57] | 0.65 | 4.6 | 0   | 0   | 20 | 30 | 0    | 2680 | 0    | 1.53 | 0    | 20   | 18    | 2.4 |
|      | 0.65 | 4.7 | 25  | 0   | 20 | 30 | 2380 | 2680 | 6.94 | 1.53 | 29   | 20   | 14.7  | 2.1 |
|      | 0.65 | 4.8 | 50  | 0   | 20 | 30 | 2380 | 2680 | 6.94 | 1.53 | 29   | 20   | 14.6  | 1.9 |
|      | 0.65 | 4.8 | 75  | 0   | 20 | 30 | 2380 | 2680 | 6.94 | 1.53 | 29   | 20   | 14.2  | 1.9 |
|      | 0.72 | 5.8 | 0   | 0   | 20 | 20 | 0    | 2680 | 0    | 1.53 | 0    | 20   | 30.8  | 2.3 |
|      | 0.72 | 5.9 | 20  | 0   | 20 | 20 | 2380 | 2680 | 6.94 | 1.53 | 29   | 20   | 26.8  | 2.7 |
|      | 0.72 | 6   | 40  | 0   | 20 | 20 | 2380 | 2680 | 6.94 | 1.53 | 29   | 20   | 26.6  | 2   |
|      | 0.45 | 1.9 | 0   | 0   | 16 | 20 | 0    | 2680 | 0    | 1.53 | 0    | 20   | 66.9  | 3.8 |
|      | 0.45 | 2.3 | 20  | 0   | 16 | 20 | 2380 | 2680 | 6.94 | 1.53 | 29   | 20   | 49.3  | 2.8 |
|      | 0.45 | 2.5 | 40  | 0   | 16 | 20 | 2380 | 2680 | 6.94 | 1.53 | 29   | 20   | 40.9  | 2.7 |
| [58] | 0.6  | 3.5 | 0   | 0   | 16 | 20 | 0    | 2680 | 0    | 1.9  | 0    | 0    | 42    | 4.7 |
|      | 0.6  | 3.4 | 20  | 0   | 16 | 20 | 2380 | 2680 | 6.9  | 1.9  | 0    | 0    | 42.9  | 4.7 |
|      | 0.6  | 3.4 | 50  | 0   | 16 | 20 | 2380 | 2680 | 6.9  | 1.9  | 0    | 0    | 42.5  | 4.7 |
|      | 0.6  | 3.2 | 100 | 0   | 16 | 20 | 2380 | 0    | 6.9  | 0    | 0    | 0    | 40.9  | 4.8 |
|      | 0.5  | 2.7 | 0   | 0   | 16 | 20 | 0    | 2680 | 0    | 1.9  | 0    | 0    | 50.2  | 5.1 |
|      | 0.5  | 2.6 | 20  | 0   | 16 | 20 | 2380 | 2680 | 6.9  | 1.9  | 0    | 0    | 51.6  | 5.1 |
|      | 0.5  | 2.5 | 50  | 0   | 16 | 20 | 2380 | 2680 | 6.9  | 1.9  | 0    | 0    | 51.6  | 5.1 |

|      |      |     |     |   |    |    |      |      |     |     |      |      |      |     |
|------|------|-----|-----|---|----|----|------|------|-----|-----|------|------|------|-----|
|      | 0.5  | 2.4 | 100 | 0 | 16 | 20 | 2380 | 0    | 6.9 | 0   | 0    | 0    | 50.3 | 5.3 |
| [59] | 0.5  | 3.4 | 0   | 0 | 22 | 22 | 0    | 2670 | 0   | 0   | 0    | 0    | 46.7 | 0   |
|      | 0.5  | 3.4 | 50  | 0 | 12 | 22 | 2380 | 2670 | 0   | 0   | 0    | 0    | 46.9 | 0   |
|      | 0.5  | 3.4 | 50  | 0 | 22 | 22 | 2380 | 2670 | 0   | 0   | 0    | 0    | 46.4 | 0   |
|      | 0.5  | 3.4 | 100 | 0 | 22 | 22 | 2380 | 0    | 0   | 0   | 0    | 0    | 48.6 | 0   |
| [60] | 0.52 | 2.2 | 0   | 0 | 19 | 10 | 0    | 2810 | 0   | 0.4 | 0    | 0    | 29.9 | 3.6 |
|      | 0.49 | 2.1 | 25  | 0 | 19 | 10 | 2500 | 2810 | 6.6 | 0.4 | 0    | 0    | 32.6 | 3.3 |
| [61] | 0.5  | 3.5 | 50  | 0 | 8  | 20 | 2330 | 2750 | 3.8 | 0.8 | 41.4 | 24.3 | 33   | 0   |
|      | 0.5  | 3.2 | 50  | 0 | 8  | 20 | 2280 | 0    | 4.1 | 0   | 0    | 0    | 29.1 | 0   |
| [62] | 0.68 | 3.8 | 0   | 0 | 20 | 20 | 0    | 2600 | 0   | 0.9 | 0    | 0    | 34.5 | 0   |
|      | 0.68 | 3.6 | 100 | 0 | 20 | 20 | 2450 | 0    | 3.1 | 0   | 0    | 0    | 35   | 0   |
|      | 0.68 | 3.4 | 100 | 0 | 20 | 20 | 2370 | 0    | 7.1 | 0   | 0    | 0    | 29.2 | 0   |
|      | 0.68 | 3.4 | 100 | 0 | 20 | 20 | 2360 | 0    | 7.8 | 0   | 0    | 0    | 27.7 | 0   |
|      | 0.51 | 3.3 | 0   | 0 | 20 | 20 | 0    | 2600 | 0   | 0.9 | 0    | 0    | 48.3 | 0   |
|      | 0.51 | 3.1 | 100 | 0 | 20 | 20 | 2450 | 0    | 3.1 | 0   | 0    | 0    | 47.6 | 0   |
|      | 0.51 | 3   | 100 | 0 | 20 | 20 | 2370 | 0    | 7.1 | 0   | 0    | 0    | 42   | 0   |
|      | 0.51 | 3   | 100 | 0 | 20 | 20 | 2360 | 0    | 7.8 | 0   | 0    | 0    | 42.9 | 0   |
|      | 0.44 | 2.5 | 0   | 0 | 20 | 20 | 0    | 2600 | 0   | 0.9 | 0    | 0    | 61.6 | 0   |
|      | 0.44 | 2.4 | 100 | 0 | 20 | 20 | 2450 | 0    | 3.1 | 0   | 0    | 0    | 60   | 0   |
|      | 0.44 | 2.3 | 100 | 0 | 20 | 20 | 2370 | 0    | 7.1 | 0   | 0    | 0    | 53.7 | 0   |
|      | 0.44 | 2.3 | 100 | 0 | 20 | 20 | 2360 | 0    | 7.8 | 0   | 0    | 0    | 53.2 | 0   |
|      | 0.34 | 2.2 | 0   | 0 | 20 | 20 | 0    | 2600 | 0   | 0.9 | 0    | 0    | 80.8 | 0   |
|      | 0.34 | 2.1 | 100 | 0 | 20 | 20 | 2450 | 0    | 3.1 | 0   | 0    | 0    | 78.2 | 0   |
|      | 0.34 | 2   | 100 | 0 | 20 | 20 | 2370 | 0    | 7.1 | 0   | 0    | 0    | 71.2 | 0   |
|      | 0.34 | 2   | 100 | 0 | 20 | 20 | 2360 | 0    | 7.8 | 0   | 0    | 0    | 65.4 | 0   |
| [63] | 0.5  | 3.1 | 0   | 0 | 19 | 19 | 0    | 2730 | 0   | 0.3 | 0    | 0    | 36.5 | 0   |
|      | 0.5  | 3   | 30  | 0 | 19 | 19 | 2570 | 2730 | 2.7 | 0.3 | 0    | 0    | 33.6 | 0   |
|      | 0.5  | 3   | 60  | 0 | 19 | 19 | 2570 | 2730 | 2.7 | 0.3 | 0    | 0    | 30.4 | 0   |
|      | 0.5  | 2.8 | 100 | 0 | 19 | 19 | 2570 | 0    | 2.7 | 0   | 0    | 0    | 29.1 | 0   |
| [64] | 0.65 | 3.1 | 0   | 0 | 20 | 19 | 0    | 2500 | 0   | 1.7 | 0    | 32   | 40.5 | 0   |
|      | 0.65 | 3.2 | 20  | 0 | 20 | 19 | 2300 | 2500 | 5.2 | 1.7 | 40.2 | 32   | 39.5 | 0   |
|      | 0.65 | 3.2 | 50  | 0 | 20 | 19 | 2300 | 2500 | 5.2 | 1.7 | 40.2 | 0    | 40.8 | 0   |
|      | 0.65 | 3.2 | 100 | 0 | 20 | 19 | 2300 | 0    | 5.2 | 0   | 40.2 | 32   | 43.7 | 0   |
|      | 0.65 | 3.1 | 0   | 0 | 20 | 19 | 0    | 2500 | 0   | 1.7 | 0    | 32   | 40.5 | 0   |
|      | 0.65 | 3.1 | 20  | 0 | 20 | 19 | 2300 | 2500 | 5.5 | 1.7 | 28.6 | 32   | 41   | 0   |

|      |      |     |     |   |    |    |      |      |      |     |      |    |      |      |
|------|------|-----|-----|---|----|----|------|------|------|-----|------|----|------|------|
|      | 0.65 | 3.1 | 50  | 0 | 20 | 19 | 2300 | 2500 | 5.5  | 1.7 | 28.6 | 32 | 38.8 | 0    |
|      | 0.65 | 3.2 | 100 | 0 | 20 | 19 | 2300 | 0    | 5.5  | 0   | 28.6 | 0  | 39.9 | 0    |
| [65] | 0.42 | 2.7 | 0   | 0 | 25 | 25 | 0    | 2570 | 0    | 1.1 | 0    | 0  | 38.6 | 10.2 |
|      | 0.4  | 2.7 | 16  | 0 | 25 | 25 | 2200 | 2570 | 5.4  | 1.1 | 0    | 0  | 32.7 | 9.7  |
|      | 0.39 | 2.2 | 37  | 0 | 25 | 25 | 2200 | 2570 | 5.4  | 1.1 | 0    | 0  | 31.7 | 9    |
|      | 0.36 | 2.7 | 52  | 0 | 25 | 20 | 2200 | 2570 | 5.4  | 1.1 | 0    | 0  | 29   | 8.9  |
| [66] | 0.86 | 4.6 | 0   | 0 | 22 | 20 | 0    | 2537 | 0    | 1.3 | 0    | 0  | 23.9 | 0    |
|      | 0.65 | 3.4 | 0   | 0 | 22 | 20 | 0    | 2537 | 0    | 1.3 | 0    | 0  | 38.7 | 0    |
|      | 0.41 | 2.9 | 0   | 0 | 22 | 20 | 0    | 2537 | 0    | 1.3 | 0    | 0  | 71.1 | 0    |
|      | 0.87 | 4.6 | 100 | 0 | 22 | 20 | 2451 | 0    | 7.8  | 0   | 0    | 0  | 19.7 | 0    |
|      | 0.66 | 3.4 | 100 | 0 | 22 | 20 | 2387 | 0    | 6.9  | 0   | 0    | 0  | 35.7 | 0    |
|      | 0.42 | 2.8 | 100 | 0 | 22 | 20 | 2362 | 0    | 4.2  | 0   | 0    | 0  | 66.8 | 0    |
|      | 0.86 | 4.6 | 100 | 0 | 22 | 20 | 2456 | 0    | 7.5  | 0   | 0    | 0  | 21.8 | 0    |
|      | 0.65 | 3.5 | 100 | 0 | 22 | 20 | 2455 | 0    | 6.4  | 0   | 0    | 0  | 36.1 | 0    |
|      | 0.42 | 2.9 | 100 | 0 | 22 | 20 | 2496 | 0    | 4.2  | 0   | 0    | 0  | 68.5 | 0    |
|      | 0.81 | 4.9 | 0   | 0 | 22 | 20 | 0    | 2665 | 0    | 1   | 0    | 0  | 27.5 | 0    |
|      | 0.63 | 3.6 | 0   | 0 | 22 | 20 | 0    | 2665 | 0    | 1   | 0    | 0  | 42.4 | 0    |
|      | 0.4  | 3   | 0   | 0 | 22 | 20 | 0    | 2665 | 0    | 1   | 0    | 0  | 72.3 | 0    |
|      | 0.84 | 4.5 | 100 | 0 | 22 | 20 | 2401 | 0    | 7.6  | 0   | 0    | 0  | 21   | 0    |
|      | 0.63 | 3.5 | 100 | 0 | 22 | 20 | 2484 | 0    | 5.4  | 0   | 0    | 0  | 41.1 | 0    |
|      | 0.4  | 2.8 | 100 | 0 | 22 | 20 | 2363 | 0    | 3.6  | 0   | 0    | 0  | 70.2 | 0    |
|      | 0.82 | 4.7 | 100 | 0 | 22 | 20 | 2447 | 0    | 6.9  | 0   | 0    | 0  | 23.6 | 0    |
|      | 0.64 | 3.4 | 100 | 0 | 22 | 22 | 2458 | 0    | 5.8  | 0   | 0    | 0  | 39.7 | 0    |
|      | 0.42 | 2.9 | 100 | 0 | 22 | 22 | 2464 | 0    | 3.9  | 0   | 0    | 0  | 66.5 | 0    |
| [67] | 0.64 | 3   | 0   | 0 | 19 | 20 | 0    | 2634 | 0    | 1.3 | 0    | 0  | 33   | 0    |
|      | 0.77 | 3.1 | 100 | 0 | 19 | 20 | 2268 | 0    | 4.9  | 0   | 0    | 0  | 27.5 | 0    |
|      | 0.7  | 3.4 | 100 | 0 | 19 | 20 | 1946 | 0    | 11.9 | 0   | 0    | 0  | 29.9 | 0    |
| [68] | 0.6  | 3.6 | 0   | 0 | 19 | 19 | 0    | 2730 | 0    | 0.5 | 0    | 23 | 47.8 | 0    |
|      | 0.59 | 3.3 | 20  | 0 | 19 | 19 | 2320 | 2730 | 5.3  | 0.5 | 37   | 23 | 49.3 | 0    |
|      | 0.57 | 3.3 | 50  | 0 | 19 | 19 | 2320 | 2730 | 5.3  | 0.5 | 37   | 23 | 47.5 | 0    |
|      | 0.54 | 3   | 100 | 0 | 19 | 19 | 2320 | 0    | 5.3  | 0   | 37   | 0  | 53.7 | 0    |
|      | 0.46 | 2.6 | 0   | 0 | 19 | 19 | 0    | 2730 | 0    | 0.5 | 0    | 23 | 62   | 0    |
|      | 0.45 | 2.5 | 20  | 0 | 19 | 19 | 2320 | 2730 | 5.3  | 0.5 | 37   | 23 | 64.8 | 0    |
|      | 0.44 | 2.5 | 50  | 0 | 19 | 19 | 2320 | 2730 | 5.3  | 0.5 | 37   | 23 | 63.5 | 0    |
|      | 0.42 | 2.3 | 100 | 0 | 19 | 19 | 2320 | 0    | 5.3  | 0   | 37   | 0  | 65.1 | 0    |

|      |     |     |   |    |    |      |      |     |     |    |    |      |   |
|------|-----|-----|---|----|----|------|------|-----|-----|----|----|------|---|
| 0.67 | 3.6 | 0   | 0 | 19 | 19 | 0    | 2730 | 0   | 0.5 | 0  | 23 | 62   | 0 |
| 0.68 | 3.4 | 20  | 0 | 19 | 19 | 2320 | 2730 | 5.3 | 0.5 | 37 | 23 | 64.8 | 0 |
| 0.67 | 3   | 50  | 0 | 19 | 19 | 2320 | 2730 | 5.3 | 0.5 | 37 | 23 | 63.5 | 0 |
| 0.7  | 2.3 | 100 | 0 | 19 | 19 | 2320 | 0    | 5.3 | 0   | 37 | 0  | 65.1 | 0 |
| 0.53 | 2.7 | 0   | 0 | 19 | 19 | 0    | 2730 | 0   | 0.5 | 0  | 23 | 57.3 | 0 |
| 0.53 | 2.5 | 20  | 0 | 19 | 19 | 2320 | 2730 | 5.3 | 0.5 | 37 | 23 | 54.9 | 0 |
| 0.53 | 2.2 | 50  | 0 | 19 | 19 | 2320 | 2730 | 5.3 | 0.5 | 37 | 23 | 51.5 | 0 |
| 0.52 | 1.8 | 100 | 0 | 19 | 19 | 2320 | 0    | 5.3 | 0   | 37 | 0  | 50.3 | 0 |
| 0.51 | 3.1 | 0   | 0 | 19 | 19 | 0    | 2730 | 0   | 0.5 | 0  | 23 | 60.1 | 0 |
| 0.52 | 3.2 | 20  | 0 | 19 | 19 | 2320 | 2730 | 5.3 | 0.5 | 37 | 23 | 56.5 | 0 |
| 0.54 | 3   | 50  | 0 | 19 | 19 | 2320 | 2730 | 5.3 | 0.5 | 37 | 23 | 48.9 | 0 |
| 0.58 | 2.8 | 100 | 0 | 19 | 19 | 2320 | 0    | 5.3 | 0   | 37 | 0  | 43.1 | 0 |
| 0.42 | 2.7 | 0   | 0 | 19 | 19 | 0    | 2730 | 0   | 0.5 | 0  | 23 | 72.9 | 0 |
| 0.42 | 2.9 | 20  | 0 | 19 | 19 | 2320 | 2730 | 5.3 | 0.5 | 37 | 23 | 67.4 | 0 |
| 0.44 | 2.7 | 50  | 0 | 19 | 19 | 2320 | 2730 | 5.3 | 0.5 | 37 | 23 | 61.2 | 0 |
| 0.49 | 2.5 | 100 | 0 | 19 | 19 | 2320 | 0    | 5.3 | 0   | 37 | 0  | 53.7 | 0 |

## References

- Yoda, K.; Yoshikane, T.; Nakashima, Y.; Soshiroda, T. *Recycled cement and recycled concrete in Japan*. In: Proceedings of the international conference on demolition and reuse of concrete and masonry; 7–11 November 1988, Tokyo, Japan, 527–536.
- Limbachiya, M.C.; Leelawat, T.; Dhir, R.K. Use of recycled concrete aggregate in high-strength concrete. *Mater. Struct.* **2000**, *33*, 574–580, doi:10.1007/bf02480538.
- Ajdukiewicz, A.; Kliszczewicz, A. Influence of recycled aggregates on mechanical properties of HS/HPC. *Cem. Concr. Compos.* **2002**, *24*, 269–279, doi:10.1016/s0958-9465(01)00012-9.
- Gómez-Soberón, J.M. Porosity of recycled concrete with substitution of recycled concrete aggregate: An experimental study. *Cem. Concr. Res.* **2002**, *32*, 1301–1311, doi:10.1016/s0008-8846(02)00795-0.
- Vázquez, E.; Hendriks, C.F.; Janssen, G.M.T. *Influence of recycled concrete aggregates on concrete durability*. In *International RILEM Conference on the Use of Recycled Materials in Building and Structures*; RILEM Publications SARL: Paris, France, 2004; 554–562.
- Poon, C.; Shui, Z.; Lam, L.; Fok, H.; Kou, S. Influence of moisture states of natural and recycled aggregates on the slump and compressive strength of concrete. *Cem. Concr. Res.* **2004**, *34*, 31–36, doi:10.1016/s0008-8846(03)00186-8.
- Lin, Y.-H.; Tyan, Y.-Y.; Chang, T.-P.; Chang, C.-Y. An assessment of optimal mixture for concrete made with recycled concrete aggregates. *Cem. Concr. Res.* **2004**, *34*, 1373–1380, doi:10.1016/j.cemconres.2003.12.032.
- Xiao, J.-Z.; Li, J.; Zhang, C. On relationships between the mechanical properties of recycled aggregate concrete: An overview. *Mater. Struct.* **2006**, *39*, 655–664, doi:10.1617/s11527-006-9093-0.
- X.U. Wei, Experimental study on influence of recycled coarse aggregates contents on properties of recycled aggregate concrete, *Concrete* **10** (2006) 45–47.
- Etxeberria, M.; Mari, A.R.; Vázquez, E. Recycled aggregate concrete as structural material. *Mater. Struct.* **2007**, *40*, 529–541.
- Etxeberria, M.; Vázquez, E.; Mari, A.; Barra, M. Influence of amount of recycled coarse aggregates and production process on properties of recycled aggregate concrete. *Cem. Concr. Res.* **2007**, *37*, 735–742, doi:10.1016/j.cemconres.2007.02.002.
- Evangelista, L.; de Brito, J. Mechanical behaviour of concrete made with fine recycled concrete aggregates. *Cem. Concr. Compos.* **2007**, *29*, 397–401, doi:10.1016/j.cemconcomp.2006.12.004.
- Poon, C.S.; Kou, S.C.; Lam, L. Influence of recycled aggregate on slump and bleeding of fresh concrete. *Mater. Struct.* **2006**, *40*, 981–988, doi:10.1617/s11527-006-9192-y.
- Ajdukiewicz, A.B.; Kliszczewicz, A.T.; Comparative tests of beams and columns made of recycled aggregate concrete and natural aggregate concrete. *J. Adv. Concr. Technol.* **2007**, *5*, 259–273.
- Min-Ping, H.U. Mechanical properties of concrete prepared with different recycled coarse aggregates replacement rate, *Concrete* **2007**, *2*, 16.
- Kou, S.C.; Poon, C.S.; Chan, D. Influence of Fly Ash as Cement Replacement on the Properties of Recycled Aggregate Concrete. *J. Mater. Civ. Eng.* **2007**, *19*, 709–717, doi:10.1061/(asce)0899-1561(2007)19:9(709).
- Rahal, K. Mechanical properties of concrete with recycled coarse aggregate. *Build. Environ.* **2007**, *42*, 407–415, doi:10.1016/j.buildenv.2005.07.033.
- Wang, Z.W. Production and properties of high quality recycled aggregates. *Concrete* **2007**, *3*, 74–77.
- Casuccio, M.; Torrijos, M.; Giaccio, G.; Zerbino, R. Failure mechanism of recycled aggregate concrete. *Constr. Build. Mater.* **2008**, *22*, 1500–1506, doi:10.1016/j.conbuildmat.2007.03.032.
- Min-Ping, H. Mechanical properties of recycled aggregate concrete at early ages. *Concrete* **2008**, *223*, 37–41.
- Kou, S.C.; Poon, C.S.; Chan, D. Influence of fly ash as a cement addition on the hardened properties of recycled aggregate concrete. *Mater. Struct.* **2007**, *41*, 1191–1201, doi:10.1617/s11527-007-9317.
- Yang, K.-H.; Chung, H.-S.; Ashour, A.F. Influence of Type and Replacement Level of Recycled Aggregates on Concrete Properties, *ACI Mater. J.* **2008**, *105*, 289–296.
- Zhou, H.; Liu, B.K.; Lu, G. Experimental research on the basic mechanical properties of recycled aggregate concrete. *J. Anhui Inst Architect Indust* **2008**, *16*, 4–8.
- Domingo-Cabo, A.; Lázaro, C.; Gayarre, F.L.; Serrano-López, M.; Serna, P.; Castaño-Tabares, J. Creep and shrinkage of recycled aggregate concrete. *Constr. Build. Mater.* **2009**, *23*, 2545–2553, doi:10.1016/j.conbuildmat.2009.02.018.
- Padmini, A.K.; Ramamurthy, K.; Mathews, M.S.; Influence of parent concrete on the properties of recycled aggregate concrete. *Constr. Build. Mater.* **2009**, *23*, 829–836.
- Yang, X.; Wu, J.; Liang, J.G. Experimental study on relationship between tensile strength and compressive strength of recycled aggregate concrete. *Sichuan Build. Sci* **2009**, *35*, 190–192.
- Ye, H. Experimental study on mechanical properties of concrete made with high quality recycled aggregates. *Sichuan Build Sci* **2009**, *35*, 195–199.
- Corinaldesi, V. Mechanical and elastic behaviour of concretes made of recycled-concrete coarse aggregates. *Constr. Build. Mater.* **2010**, *24*, 1616–1620, doi:10.1016/j.conbuildmat.2010.02.031.
- Kumutha, R.; Vijai, K. Strength of concrete incorporating aggregates recycled from demolition waste. *ARPN J. of Eng. Appl. Sci.* **2010**, *5*, 64–71.

30. Malešev, M.; Radonjanin, V.; Marinković, S. Recycled Concrete as Aggregate for Structural Concrete Production. *Sustainability* **2010**, *2*, 1204–1225, doi:10.3390/su2051204.
31. Zega, C.J.; Di Maio, Ángel A. Recycled Concretes Made with Waste Ready-Mix Concrete as Coarse Aggregate. *J. Mater. Civ. Eng.* **2011**, *23*, 281–286, doi:10.1061/(asce)mt.1943-5533.0000165.
32. Belén, G.-F.; Fernando, M.-A.; Diego, C.L.; Sindy, S.-P. Stress–strain relationship in axial compression for concrete using recycled saturated coarse aggregate. *Constr. Build. Mater.* **2011**, *25*, 2335–2342, doi:10.1016/j.conbuildmat.2010.11.031.
33. Fathifazl, G.; Razaqpur, A.G.; Isgor, O.B.; Abbas, A.; Fournier, B.; Foo, S.; Creep and drying shrinkage characteristics of concrete produced with coarse recycled concrete aggregate. *Cem. Concr. Compos.* **2011**, *33*, 1026–1037.
34. González-Fontebo, B.; Martínez-Abella, F.; Eiras-López, J.; Paz, S.S. Effect of recycled coarse aggregate on damage of recycled concrete. *Mater. Struct.* **2011**, *44*, 1759–1771, doi:10.1617/s11527-011-9736-7.
35. Rao, M.C.; Bhattacharyya, S.K.; Barai, S.V. Influence of field recycled coarse aggregate on properties of concrete. *Mater. Struct.* **2010**, *44*, 205–220, doi:10.1617/s11527-010-9620-x.
36. Somna, R.; Jaturapitakkul, C.; Chalee, W.; Rattanachu, P. Effect of the Water to Binder Ratio and Ground Fly Ash on Properties of Recycled Aggregate Concrete. *J. Mater. Civ. Eng.* **2012**, *24*, 16–22, doi:10.1061/(asce)mt.1943-5533.0000360.
37. Elhakam, A.A.; Mohamed, A.E.; Awad, E. Influence of self-healing, mixing method and adding silica fume on mechanical properties of recycled aggregates concrete. *Constr. Build. Mater.* **2012**, *35*, 421–427, doi:10.1016/j.conbuildmat.2012.04.013.
38. Cui, Z.L.; Lu, S.S.; Wang, Z.S. Influence of recycled aggregate on strength and anti-carbonation properties of recycled aggregate concrete. *J. Build. Mater* **2012**, *15*, 264–267.
39. Hoffmann, C.; Schubert, S.; Leemann, A.; Motavalli, M. Recycled concrete and mixed rubble as aggregates: Influence of variations in composition on the concrete properties and their use as structural material. *Constr. Build. Mater.* **2012**, *35*, 701–709.
40. Li, H.; Xiao, J.Z. On fatigue strength of recycled aggregate concrete based on its elastic modulus. *J. Build. Mater* **2012**, *15*, 260–263.
41. Limbachiya, M.; Meddah, M.S.; Ouchagour, Y. Performance of Portland/Silica Fume Cement Concrete Produced with Recycled Concrete Aggregate. *ACI Mater. J.* **2012**, *109*, 91–100.
42. Marinković, S.; Radonjanin, V.; Malešev, M.; Ignjatović, I. Comparative environmental assessment of natural and recycled aggregate concrete. *Waste Manag.* **2010**, *30*, 2255–2264, doi:10.1016/j.wasman.2010.04.012.
43. Pereira, P.; Evangelista, L.; de Brito, J. The effect of superplasticizers on the mechanical performance of concrete made with fine recycled concrete aggregates. *Cem. Concr. Compos.* **2012**, *34*, 1044–1052, doi:10.1016/j.cemconcomp.2012.06.009.
44. Barbudo, A.; De Brito, J.; Evangelista, L.; Bravo, M.; Agrela, F. Influence of water-reducing admixtures on the mechanical performance of recycled concrete. *J. of Clean. Prod.* **2013**, *59*, 93–98.
45. Butler, L.; West, J.S.; Tighe, S.L.; Effect of recycled concrete coarse aggregate from multiple sources on the hardened properties of concrete with equivalent compressive strength. *Constr. Build. Mater.* **2013**, *47*, 1292–1301.
46. Chen, Z.P.; Xu, J.J.; Zheng, H.H.; Su, Y.S.; Xue, J.Y.; Li, J.T. Basic mechanical properties test and stress-strain constitutive relations of recycled coarse aggregate concrete. *J. Build. Mater.* **2013**, *16*, 24–32.
47. Y.L. Hou, G. Zheng, Mechanical properties of recycled aggregate concrete in different age. *J Build Mater* **2013**, *16*, 683–687.
48. Ismail, S.; Ramli, M. Engineering properties of treated recycled concrete aggregate (RCA) for structural applications. *Constr. Build. Mater.* **2013**, *44*, 464–476.
49. Manzi, S.; Mazzotti, C.; Bignozzi, M.C. Short and long-term behavior of structural concrete with recycled concrete aggregate. *Cem. Concr. Compos.* **2013**, *37*, 312–318.
50. Matias, D.; De Brito, J.; Rosa, A.; Pedro, D. Mechanical properties of concrete produced with recycled coarse aggregates—Influence of the use of superplasticizers. *Constr. Build. Mater.* **2013**, *44*, 101–109.
51. Sheen, Y.-N.; Wang, H.-Y.; Juang, Y.-P.; Le, D.-H. Assessment on the engineering properties of ready-mixed concrete using recycled aggregates. *Constr. Build. Mater.* **2013**, *45*, 298–305.
52. Thomas, C.; Setién, J.; Polanco, J.A.; Alaejos, P.; De Juan, M.S. Durability of recycled aggregate concrete. *Constr. Build. Mater.* **2013**, *40*, 1054–1065, doi:10.1016/j.conbuildmat.2012.11.106.
53. Ulloa, V.A.; García-Taengua, E.; Pelufo, M.-J.; Domingo, A.; Serna, P. New views on effect of recycled aggregates on concrete compressive strength. *ACI Mater. J.* **2013**, *110*, 1–10.
54. Xiao, J.; Li, H.; Yang, Z. Fatigue behavior of recycled aggregate concrete under compression and bending cyclic loadings. *Constr. Build. Mater.* **2013**, *38*, 681–688, doi:10.1016/j.conbuildmat.2012.09.024.
55. Younis, K.; Pilakoutas, K. Strength prediction model and methods for improving recycled aggregate concrete. *Constr. Build. Mater.* **2013**, *49*, 688–701, doi:10.1016/j.conbuildmat.2013.09.003.
56. Andreu, G.; Miren, E. Experimental analysis of properties of high performance recycled aggregate concrete. *Constr. Build. Mater.* **2014**, *52*, 227–235, doi:10.1016/j.conbuildmat.2013.11.054.

57. Beltrán, M.G.; Agrela, F.; Barbudo, A.; Ayuso, J.; Ramírez, A. Mechanical and durability properties of concretes manufactured with biomass bottom ash and recycled coarse aggregates. *Constr. Build. Mater.* **2014**, *72*, 231–238, doi:10.1016/j.conbuildmat.2014.09.019.
58. Beltrán, M.G.; Barbudo, A.; Agrela, F.; Galvín, A.P.; Jiménez, J.R. Effect of cement addition on the properties of recycled concretes to reach control concretes strengths. *J. Clean. Prod.* **2014**, *79*, 124–133, doi:10.1016/j.jclepro.2014.05.053.
59. Çakır, Ö.; Sofyanlı, Ö.Ö. Influence of silica fume on mechanical and physical properties of recycled aggregate concrete. *HBRC J.* **2015**, *11*, 157–166, doi:10.1016/j.hbrj.2014.06.002.
60. Carneiro, J.A.; Lima, P.R.L.; Leite, M.B.; Toledo Filho, R.D. Compressive stress–strain behavior of steel fiber reinforced-recycled aggregate concrete. *Cem. Concr. Compos.* **2014**, *46*, 65–72.
61. Dilbas, H.; Şimşek, M.; Çakır, Ö. An investigation on mechanical and physical properties of recycled aggregate concrete (RAC) with and without silica fume. *Constr. Build. Mater.* **2014**, *61*, 50–59, doi:10.1016/j.conbuildmat.2014.02.057.
62. Duan, Z.; Poon, C.S. Properties of recycled aggregate concrete made with recycled aggregates with different amounts of old adhered mortars. *Mater. Des.* **2014**, *58*, 19–29, doi:10.1016/j.matdes.2014.01.044.
63. Folino, P.; Xargay, H. Recycled aggregate concrete – Mechanical behavior under uniaxial and triaxial compression. *Constr. Build. Mater.* **2014**, *56*, 21–31, doi:10.1016/j.conbuildmat.2014.01.073.
64. Gayarre, F.L.; Pérez, C.L.-C.; López, M.A.S.; Cabo, A.D. The effect of curing conditions on the compressive strength of recycled aggregate concrete. *Constr. Build. Mater.* **2014**, *53*, 260–266, doi:10.1016/j.conbuildmat.2013.11.112.
65. Kang, T.H.-K.; Kim, W.; KwakY.-K.; Hong, S.-G. Flexural Testing of Reinforced Concrete Beams with Recycled Concrete Aggregates. *ACI Struct. J.* **2014**, *111*, doi:10.14359/51686622.
66. Pedro, D.; de Brito, J.; Evangelista, L. Performance of concrete made with aggregates recycled from precasting industry waste: influence of the crushing process. *Mater. Struct.* **2014**, *48*, 3965–3978, doi:10.1617/s11527-014-0456-7.
67. Pepe, M.; Toledo Filho, R.D.; Koenders, E.A.B.; Martinelli, E. Alternative processing procedures for recycled aggregates in structural concrete. *Constr. and Build. Mater.* **2014**, *69*, 124–132.
68. Thomas, C.; Sosa, I.; Setién, J.; Polanco, J.A.; Cimentada, A.I. Evaluation of the fatigue behavior of recycled aggregate concrete. *J. Clean. Prod.* **2014**, *65*, 397–405.
